# Supplementary material for: Oxidation-induced coupling reactions of bi(metallacycloprop-1-ene) complexes
Source: Royal Society of Chemistry journal article supplement (doi:10.1039/d4cc04079a), 2024-01-01
Supplement: d4cc04079a1.pdf [file d4cc04079a1.pdf]

## **Oxidation induced coupling reactions of bi(metallacycloprop-1-ene) complexes**

Long Yiu Tsang,<sup>‡a</sup> Lam Cheung Kong,<sup>‡a</sup> Herman H. Y. Sung,<sup>a</sup> Ian D. Williams<sup>\*a</sup> and Guochen Jia<sup>\*a</sup>

<sup>a</sup> Department of Chemistry, The Hong Kong University of Science and Technology, Clear Water

Bay, Kowloon, Hong Kong, P.R. China

<sup>‡</sup>These authors contributed equally

### **Supporting Information**

#### **Table of Contents**

|                                                                           |                |
|---------------------------------------------------------------------------|----------------|
| <b>1. Experimental details</b>                                            | <b>S2-S5</b>   |
| <b>2. X-ray crystallographic study of complexes 2a-d</b>                  | <b>S6-S9</b>   |
| <b>3. A proposed mechanism for ReO<sub>4</sub><sup>-</sup> production</b> | <b>S10</b>     |
| <b>4. Computational studies</b>                                           | <b>S11-S14</b> |
| <b>5. Cartesian Coordinates of Calculated Structures</b>                  | <b>S15-S18</b> |
| <b>6. NMR and MS spectra</b>                                              | <b>S19-S28</b> |
| <b>7. References</b>                                                      | <b>S29-S30</b> |

## 1. Experimental details

**General information.** All manipulations were carried out under a nitrogen atmosphere using standard Schlenk techniques unless otherwise stated. Solvents were distilled under nitrogen from sodium benzophenone (hexane, ether, tetrahydrofuran THF), sodium (toluene), or CaH<sub>2</sub> (dichloromethane, DCM). The starting materials ReX<sub>3</sub>(PPh<sub>3</sub>)<sub>2</sub>(N≡CMe) (X = Cl and Br),<sup>1</sup> ReCl<sub>3</sub>(η<sup>2</sup>-C(Ar)=CH(PPh<sub>3</sub>))<sub>2</sub> (Ar = Ph, **1a**; *p*-C<sub>6</sub>H<sub>4</sub>-C<sub>6</sub>H<sub>5</sub>, **1c**, and *o*-C<sub>6</sub>H<sub>4</sub>CF<sub>3</sub>, **1e**)<sup>2</sup> were prepared following the procedure described in the literature. All other reagents were used as purchased from Aldrich Chemical Co.. Microanalyses were performed by M-H-W Laboratories (Phoenix, AZ) or MEDAC Ltd (Egham, UK). <sup>1</sup>H, <sup>13</sup>C{<sup>1</sup>H}, and <sup>31</sup>P{<sup>1</sup>H} NMR spectra were collected on a Bruker-400 spectrometer (400 MHz) and JEOL 600 MHz spectrometer. <sup>1</sup>H and <sup>13</sup>C NMR shifts are relative to TMS, and <sup>31</sup>P chemical shifts are relative to 85% H<sub>3</sub>PO<sub>4</sub>.

**Preparation of ReBr<sub>3</sub>{η<sup>2</sup>-C(Ph)=CH(PPh<sub>3</sub>)}<sub>2</sub> (**1b**).** A mixture of ReBr<sub>3</sub>(PPh<sub>3</sub>)<sub>2</sub>(N≡CMe) (500 mg, 0.504 mmol) and phenylacetylene (0.221 mL, 2.01 mmol) in dibromomethane (5 mL) in a sealed Schlenk tube was heated at 70 °C for 4 h. The reddish solution was transferred to a Schlenk flask and the solvent was removed under vacuum to give an oily residue. The residue was redissolved in dichloromethane (10 mL). Addition of hexane (100 mL) produced an orange suspension with red oily residue stuck on the flask wall. The orange suspension was separated from the oily residue and was redissolved in DCM and re-precipitated with hexane. The resulting orange suspension (solid) was collected by filtration, and dried under vacuum. Yield: 60 mg, 10.3%. <sup>31</sup>P{<sup>1</sup>H} NMR (243 MHz, CDCl<sub>3</sub>): δ 22.69 (s). <sup>1</sup>H NMR (400 MHz, CDCl<sub>3</sub>): δ 7.80 – 7.62 (m, 12H, *PPh*), 7.61 – 7.47 (m, 6H, *PPh*), 7.44 – 7.35 (m, 12H, *PPh*), 6.91 – 6.75 (m, 6H, *Re=CPh*), 6.72 – 6.63 (m, 4H, *Re=CPh*), 5.04 (d, *J* = 10.1 Hz, 2H, *CH(PPh<sub>3</sub>)*). Anal. Calcd. for C<sub>52</sub>H<sub>42</sub>Br<sub>3</sub>P<sub>2</sub>Re: C, 54.09; H, 3.67. Found: C, 53.88; H, 3.62.

**Preparation of ReCl<sub>3</sub>{η<sup>2</sup>-C(4-(9H-carbazol-9-yl)phenyl)=CH(PPh<sub>3</sub>)}<sub>2</sub> (**1d**).** A mixture of ReCl<sub>3</sub>(PPh<sub>3</sub>)<sub>2</sub>(N≡CMe) (500 mg, 0.582 mmol) and 9-(4-ethynylphenyl)carbazole (0.33 g, 1.23 mmol) in dichloromethane (20 mL) was heated at 70 °C for 3 h in a sealed Schlenk tube. The solvent was removed by vacuum evaporation. The residue was treated with hexane (50 mL). The solid was collected by filtration, washed with a minimal amount of acetone until the filtrate not showing dark red colour. The remaining red-orange solid was dried under vacuum. Yield: 588 mg, 76.1%. <sup>31</sup>P{<sup>1</sup>H} NMR (162 MHz, CDCl<sub>3</sub>): δ 24.36 (s). <sup>1</sup>H NMR (400 MHz, CDCl<sub>3</sub>): δ

8.16 – 7.92 (m, 3H), 7.91 – 7.68 (m, 12H), 7.65 – 7.34 (m, 19H), 7.15 – 6.83 (m, 20H), 5.29 (d,  $J = 10.4$  Hz, 2H,  $CH(PPh_3)$ ). Anal. Calcd. for  $C_{76}H_{56}Cl_3N_2P_2Re \cdot CH_2Cl_2$ : C, 64.37; H, 4.07; N, 1.95. Found: C, 64.23; H, 3.70. 2.02.

**Preparation of  $ReCl_4\{\eta^4-(Ph_3P)CH=C(Ph)-C(Ph)=CH(PPh_3)\}$  (**2a**).**  $ReCl_3\{\eta^2-C(Ph)=CH(PPh_3)\}_2$  (**1a**) (78 mg, 0.076 mmol) was dissolved in air-saturated dichloromethane (DCM, 10 mL) in a vial. The vial containing the solution was placed in a chamber containing hexane (see Figure S1 for the set-up). The setup was stood on a bench for two weeks with regular refilling of dichloromethane to give green crystals and a brownish red solution. The resulting green crystals were collected by filtration, washed with dichloromethane (1 mL) and dried under vacuum to give crystalline solid of **2a** (co-crystallized with  $CH_2Cl_2$  as revealed by an X-ray diffraction study and elemental analysis). Yield: 49 mg, 56.2% calculated based on the molar ratio of **2a**· $CH_2Cl_2$  to **1a**. Anal. Calcd. for  $C_{52}H_{42}Cl_4P_2Re \cdot CH_2Cl_2$ : C, 55.75; H, 3.88. Found: C, 56.01; H, 3.95.

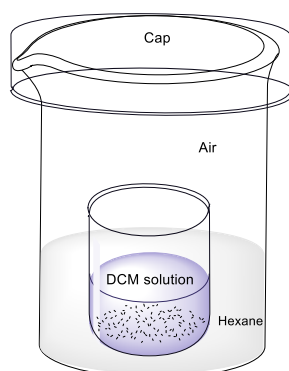

**Figure S1.** The set-up of the vapor diffusion method to prepare complexes **2** from **1**.

**Preparation of  $ReBr_4\{\eta^4-(Ph_3P)CH=C(Ph)-C(Ph)=CH(PPh_3)\}$  (**2b**).**  $ReBr_3\{\eta^2-C(Ph)=CH(PPh_3)\}_2$  (**1b**) (12 mg, 0.010 mmol) was dissolved in air-saturated dichloromethane (10 mL) in a vial. The vial containing the solution was placed in chamber containing hexane (see Figure S1 for the set-up). The setup was stood on a bench for two weeks with regularly refilling of dichloromethane to give brown crystals and a brownish red solution. The resulting brown crystals were collected by filtration, washed with dichloromethane (1 mL) and dried under vacuum to give crystalline solid of **2b** (co-crystallized with  $CH_2Cl_2$  as revealed by an X-ray diffraction study and elemental analysis). Yield: 2.5 mg, 18.4% calculated based on the molar ratio of **2b**·1.5 $CH_2Cl_2$  to **1b**. Anal. Calcd. for  $C_{52}H_{42}Br_4P_2Re \cdot 1.5CH_2Cl_2$ : C, 47.18; H, 3.33. Found: C, 47.38; H, 3.27.

**Preparation of  $\text{ReCl}_4\{\eta^4\text{-(Ph}_3\text{P)CH=C(Ar)-C(Ar)=CH(PPh}_3)\}$  (**2c**, Ar = *p*-C<sub>6</sub>H<sub>4</sub>-Ph).** Method 1.  $\text{ReCl}_3\{\eta^2\text{-C(4-biphenyl)=CH(PPh}_3)\}_2$  (**1c**) (75 mg, 0.064 mmol) was dissolved in air-saturated dichloromethane (10 mL) in a vial. The vial containing the solution was placed in a chamber containing hexane (see Figure S1 for the set-up). The setup was stood on a bench for two weeks with regular refilling of dichloromethane to give green crystals of **2c** and a brownish red solution. The resulting green crystals were collected by filtration, washed with dichloromethane (1 mL) and dried under vacuum. Yield: 26 mg, 33.7%. Anal. Calcd. for C<sub>64</sub>H<sub>50</sub>Cl<sub>4</sub>P<sub>2</sub>Re: C, 63.58; H, 4.17. Found: C, 62.96; H, 4.05.

Method 2.  $\text{ReCl}_3\{\eta^2\text{-C(4-biphenyl)=CH(PPh}_3)\}_2$  (**1c**) (67 mg, 0.057 mmol) was dissolved in THF (10 mL). The solution was stirred under a O<sub>2</sub> atmosphere (with a O<sub>2</sub> balloon) for a week to give a green suspension and a brownish red solution. The solvent was removed under vacuum, and the green residue was washed with MeOH (5 mL x 3), and dried under vacuum to give the diene complex **2c** (Yield: 31 mg, 45.0%).

**Preparation of  $\text{ReCl}_4\{\eta^4\text{-(Ph}_3\text{P)CH=C(Ar)-C(Ar)=CH(PPh}_3)\}$  (**2d**, Ar = 4-(9H-carbazol-9-yl)phenyl).**  $\text{ReCl}_3\{\eta^2\text{-C(4-(9H-carbazol-9-yl)phenyl)=CH(PPh}_3)\}_2$  (**1d**) (52 mg, 0.038 mmol) was dissolved in air-saturated dichloromethane (20 mL) in a vial. The vial containing the solution was placed in a chamber containing hexane (see Figure S1 for the set-up). The setup was stood on a bench for two weeks with regular refilling of dichloromethane to give green crystals of **2d** and a brownish red solution. The resulting green crystals were collected by filtration, washed with dichloromethane (1 mL) and dried vacuum to give crystals of **2d**. Yield: 16 mg, 28.3% calculated based on the molar ratio of **2d**·CH<sub>2</sub>Cl<sub>2</sub> to **1d**. Anal. Calcd. for C<sub>76</sub>H<sub>56</sub>Cl<sub>4</sub>N<sub>2</sub>P<sub>2</sub>Re · CH<sub>2</sub>Cl<sub>2</sub>: C, 62.82; H, 3.97; N, 1.90. Found: C, 62.95; H, 3.88; N, 1.83.

**Isolation of cis-[PhCH=CH(PPh<sub>3</sub>)]BPh<sub>4</sub> (**3aBPh<sub>4</sub>**).** A solution of the complex  $\text{ReCl}_3(\eta^2\text{-C(Ph)=CH(PPh}_3))_2$  (**1a**) (100 mg, 0.098 mmol) in dichloromethane (10 mL) was stirred under an oxygen atmosphere (with a O<sub>2</sub> balloon) for a week to give a green suspension. The solvent was removed under vacuum. The residue was washed with MeOH (5 mL x 3) and dried under vacuum to give the diene complex **2a** (Yield: 64 mg, 61.9%). The methanol washings were combined and treated with NaBPh<sub>4</sub> (100 mg, 0.292 mmol) dissolved in MeOH (3 mL) to give a brown precipitate. The precipitate was collected by filtration, washed with MeOH (2 mL x 2) and dried under vacuum. The crude product was recrystallized with DCM/Hexane to give a pale yellow crystalline solid of **3aBPh<sub>4</sub>**. Yield: 24 mg, 17.9%. <sup>31</sup>P{<sup>1</sup>H} NMR (243 MHz, CDCl<sub>3</sub>):

$\delta$  13.80 (s).  $^1\text{H}$  NMR (600 MHz,  $\text{CDCl}_3$ ):  $\delta$  7.62 (t,  $J = 7.7$  Hz, 3H,  $\text{PPh}_3$ ), 7.49 (dd,  $J = 47.0, 12.2$  Hz, 1H,  $\text{Ph}_3\text{P}-\text{CH}=\text{CHPh}$ ), 7.47 – 7.38 (m, 14H, 6H of  $\text{PPh}_3$  and 8H of  $\text{BPh}_4$ ), 7.31 – 7.24 (m, 6H,  $\text{PPh}_3$ ), 7.07 (t,  $J = 7.4$  Hz, 1H, Ph), 6.94 (t,  $J = 7.3$  Hz, 8H,  $\text{BPh}_4$ ), 6.88 (t,  $J = 7.6$  Hz, 2H, Ph), 6.82 (t,  $J = 7.2$  Hz, 4H,  $\text{BPh}_4$ ), 6.75 (d,  $J = 7.7$  Hz, 2H, Ph), 5.58 (dd,  $J = 19.2, 13.5$  Hz, 1H,  $\text{Ph}_3\text{P}-\text{CH}=\text{CHPh}$ ).  $^{13}\text{C}\{^1\text{H}\}$  NMR (151 MHz,  $\text{CDCl}_3$ ):  $\delta$  164.29 (1:1:1:1, q,  $J = 49.5$  Hz,  $\text{BPh}_4$ ), 158.98 (s,  $\text{Ph}_3\text{P}-\text{CH}=\text{CHPh}$ ), 136.39, 135.16 (d,  $J = 2.9$  Hz), 133.49 (d,  $J = 10.7$  Hz), 130.71, 130.49 (d,  $J = 13.0$  Hz), 128.99, 128.16, 125.66 (d,  $J = 3.0$  Hz), 121.80, 118.39 (d,  $J = 89.9$  Hz, ipso- $\text{PPh}$ ), 105.23 (d,  $J = 84.6$  Hz,  $\text{Ph}_3\text{P}-\text{CH}=\text{}$ ). Anal. Calcd. for  $\text{C}_{50}\text{H}_{42}\text{BP} \cdot 0.5\text{CH}_2\text{Cl}_2$ : C, 83.42; H, 5.96. Found: C, 83.14; H, 5.87.

**Isolation of diene  $[(\text{Ph}_3\text{P})\text{CH}=\text{C}(\text{Ph})-\text{C}(\text{Ph})=\text{CH}(\text{PPh}_3)]^{2+}$  (**4a**).** A mixture of  $\text{ReCl}_4\{\eta^4-(\text{Ph}_3\text{P})\text{CH}=\text{C}(\text{Ph})-\text{C}(\text{Ph})=\text{CH}(\text{PPh}_3)\}$  (**2a**) (0.25 mg, 0.237 mmol) and  $\text{NaBPh}_4$  (0.175 g, 0.511 mmol) in dichloromethane (15 mL) was sonicated to give a green solution. To the green solution was added 30w/w%  $\text{H}_2\text{O}_2$  (134 mg, 5 equiv.), and the resulting mixture was stirred at RT for 1 h to give a faint-green solution. The solvent of the solution was removed under vacuum and the residue was washed with MeOH (5 mL x 3) to give a white solid. The NMR and MS data indicate that the white solid is the salts of  $[(\text{Ph}_3\text{P})\text{CH}=\text{C}(\text{Ph})-\text{C}(\text{Ph})=\text{CH}(\text{PPh}_3)]^{2+}$  (**4a**) with  $\text{ReO}_4^-$  (major) and  $\text{BPh}_4^-$  (minor) as the counter anions. The solid was washed with dichloromethane (0.5 mL x 2) to give pure  $[(\text{Ph}_3\text{P})\text{CH}=\text{C}(\text{Ph})-\text{C}(\text{Ph})=\text{CH}(\text{PPh}_3)](\text{ReO}_4)_2$ , **4a[ReO<sub>4</sub>]<sub>2</sub>**. Yield: 144 mg, 49.5%.  $^{31}\text{P}\{^1\text{H}\}$  NMR (243 MHz,  $\text{CD}_2\text{Cl}_2$ ):  $\delta$  14.36 (s).  $^1\text{H}$  NMR (600 MHz,  $\text{CD}_2\text{Cl}_2$ ):  $\delta$  7.70 (t,  $J = 7.6$  Hz, 6H,  $\text{PPh}_3$ ), 7.63 – 7.48 (m, 24H,  $\text{PPh}_3$ ), 7.26 (d,  $J = 7.6$  Hz, 4H, Ph), 7.16 (t,  $J = 7.5$  Hz, 2H, Ph), 7.05 (t,  $J = 7.5$  Hz, 4H, Ph), 6.60 (d,  $J = 17.5$  Hz, 2H,  $\text{Ph}_3\text{P}-\text{CH}=\text{}$ ).  $^{13}\text{C}\{^1\text{H}\}$  NMR (151 MHz,  $\text{CD}_2\text{Cl}_2$ ):  $\delta$  168.61 (d,  $J = 21.9$  Hz,  $=\text{CPh}$ ), 135.26, 134.84 – 133.97 (m), 133.30, 131.32 – 130.73 (m), 130.40, 130.23, 129.48, 118.73 (d,  $J = 91.3$  Hz, ipso- $\text{PPh}$ ), 116.99 (d,  $J = 89.8$  Hz,  $\text{Ph}_3\text{P}-\text{CH}=\text{}$ ). Anal. Calcd. for  $\text{C}_{52}\text{H}_{42}\text{P}_2 \cdot 2\text{ReO}_4$ : C, 50.81; H, 3.44. Found: C, 50.40; H, 3.44. Mass spectroscopy (m/z): negative mode: 250.9380 ( $\text{ReO}_4^-$ ); positive mode: 364.1393 (**4a/2**).

## 2. X-ray crystallographic study of complexes **2a-d**.

Crystals were grown in CDCl<sub>3</sub> or DCM/*n*-hexane. All the crystals were mounted on the glass fibers. The diffraction intensity data of **2a** (CCDC no. 2244843), **2b** (CCDC no. 2325118), **2c** (CCDC no. 2244844), and **2d** (CCDC no. 2244845) were collected on a Rigaku SuperNova, Dual, Atlas diffractometer, using monochromatized Cu-K $\alpha$  radiation ( $\lambda = 1.54184 \text{ \AA}$ ). Lattice determination, data collection and reduction were carried out using CrysAlisPro software (version 1.171.35.19). Empirical absorption corrections were performed using spherical harmonics, implemented in SCALE3 ABSPACK scaling algorithm in the CrysAlisPro software suite. Structure solution and refinement for all compounds were performed using the Olex2 software package.<sup>3</sup> All the structures were solved with the SHELXT<sup>4</sup> structure solution program using Intrinsic Phasing and refined with the SHELXL<sup>5</sup> refinement package using Least Squares minimisation. All non-hydrogen atoms were refined anisotropically with a riding model for the hydrogen atoms. The crystal data are listed in Table S1. Crystallographic data have been deposited with the Cambridge Crystallographic Data Centre.

**Table S1.** Crystal data and structure refinement for complexes **2a-d**

| Complexes                        | <b>2a</b> ·2CH <sub>2</sub> Cl <sub>2</sub>                                                            | <b>2b</b> ·2CHCl <sub>3</sub>                                                            | <b>2c</b>                                                         | <b>2d</b> ·7CH <sub>2</sub> Cl <sub>2</sub>                                                                          |
|----------------------------------|--------------------------------------------------------------------------------------------------------|------------------------------------------------------------------------------------------|-------------------------------------------------------------------|----------------------------------------------------------------------------------------------------------------------|
| CCDC                             | 2244843                                                                                                | 2325118                                                                                  | 2244844                                                           | 2244845                                                                                                              |
| Empirical formula                | C <sub>52</sub> H <sub>42</sub> Cl <sub>4</sub> P <sub>2</sub> Re·2C<br>H <sub>2</sub> Cl <sub>2</sub> | C <sub>52</sub> H <sub>42</sub> Br <sub>4</sub> P <sub>2</sub> Re·<br>2CHCl <sub>3</sub> | C <sub>64</sub> H <sub>50</sub> Cl <sub>4</sub> P <sub>2</sub> Re | C <sub>76</sub> H <sub>56</sub> Cl <sub>4</sub> N <sub>2</sub> P <sub>2</sub><br>Re·7CH <sub>2</sub> Cl <sub>2</sub> |
| Formula weight                   | 1226.65                                                                                                | 1473.37                                                                                  | 1208.98                                                           | 1981.65                                                                                                              |
| Temperature/K                    | 172.99(10)                                                                                             | 173.00(10)                                                                               | 173                                                               | 100.01(10)                                                                                                           |
| Crystal system                   | monoclinic                                                                                             | monoclinic                                                                               | monoclinic                                                        | monoclinic                                                                                                           |
| Space group                      | C2/c                                                                                                   | C2/c                                                                                     | P2 <sub>1</sub> /n                                                | P2 <sub>1</sub> /c                                                                                                   |
| a/Å                              | 12.0537(3)                                                                                             | 12.08870(10)                                                                             | 15.5823(3)                                                        | 19.6823(7)                                                                                                           |
| b/Å                              | 23.1354(5)                                                                                             | 24.3009(2)                                                                               | 22.9599(3)                                                        | 18.6829(7)                                                                                                           |
| c/Å                              | 20.0755(3)                                                                                             | 19.85410(10)                                                                             | 18.0278(3)                                                        | 24.3283(8)                                                                                                           |
| $\alpha$ /°                      | 90                                                                                                     | 90                                                                                       | 90                                                                | 90                                                                                                                   |
| $\beta$ /°                       | 102.929(2)                                                                                             | 102.0850(10)                                                                             | 107.9434(17)                                                      | 110.713(4)                                                                                                           |
| $\gamma$ /°                      | 90                                                                                                     | 90                                                                                       | 90                                                                | 90                                                                                                                   |
| Volume/Å <sup>3</sup>            | 5456.5(2)                                                                                              | 5703.21(8)                                                                               | 6136.07(18)                                                       | 8367.8(5)                                                                                                            |
| Z                                | 4                                                                                                      | 4                                                                                        | 4                                                                 | 4                                                                                                                    |
| $\rho_{\text{calc}}/\text{cm}^3$ | 1.493                                                                                                  | 1.716                                                                                    | 1.309                                                             | 1.573                                                                                                                |
| $\mu/\text{mm}^{-1}$             | 8.780                                                                                                  | 10.835                                                                                   | 6.239                                                             | 8.850                                                                                                                |

|                                             |                                                               |                                                               |                                                                |                                                                |
|---------------------------------------------|---------------------------------------------------------------|---------------------------------------------------------------|----------------------------------------------------------------|----------------------------------------------------------------|
| F(000)                                      | 2444.0                                                        | 2860.0                                                        | 2428.0                                                         | 3972.0                                                         |
| Crystal size/mm <sup>3</sup>                | 0.1 × 0.08 × 0.05                                             | 0.1 × 0.04 × 0.03                                             | 0.12 × 0.1 × 0.05                                              | 0.08 × 0.06 × 0.06                                             |
| Radiation                                   | Cu Kα (λ = 1.54184)                                           | Cu Kα (λ = 1.54184)                                           | CuKα (λ = 1.54184)                                             | CuKα (λ = 1.54184)                                             |
| 2θ range for data collection/°              | 8.442 to 153.536                                              | 7.276 to 148.512                                              | 6.432 to 153.572                                               | 4.8 to 153.888                                                 |
| Index ranges                                | -13 ≤ h ≤ 15, -26 ≤ k ≤ 29, -17 ≤ l ≤ 25                      | -15 ≤ h ≤ 15, -28 ≤ k ≤ 29, -24 ≤ l ≤ 16                      | -18 ≤ h ≤ 19, -22 ≤ k ≤ 28, -20 ≤ l ≤ 22                       | -24 ≤ h ≤ 23, -23 ≤ k ≤ 15, -30 ≤ l ≤ 28                       |
| Reflections collected                       | 9902                                                          | 16796                                                         | 39181                                                          | 52122                                                          |
| Independent reflections                     | 5536 [R <sub>int</sub> = 0.0281, R <sub>sigma</sub> = 0.0363] | 5672 [R <sub>int</sub> = 0.0350, R <sub>sigma</sub> = 0.0347] | 12655 [R <sub>int</sub> = 0.0587, R <sub>sigma</sub> = 0.0675] | 17288 [R <sub>int</sub> = 0.1086, R <sub>sigma</sub> = 0.1273] |
| Data/restraints/parameters                  | 5536/71/330                                                   | 5672/79/339                                                   | 12655/0/640                                                    | 17288/38/766                                                   |
| Goodness-of-fit on F <sup>2</sup>           | 1.031                                                         | 1.041                                                         | 1.002                                                          | 1.016                                                          |
| Final R indexes [I ≥ 2σ (I)]                | R <sub>1</sub> = 0.0325, wR <sub>2</sub> = 0.0815             | R <sub>1</sub> = 0.0330, wR <sub>2</sub> = 0.0866             | R <sub>1</sub> = 0.0443, wR <sub>2</sub> = 0.1084              | R <sub>1</sub> = 0.0733, wR <sub>2</sub> = 0.1818              |
| Final R indexes [all data]                  | R <sub>1</sub> = 0.0363, wR <sub>2</sub> = 0.0840             | R <sub>1</sub> = 0.0361, wR <sub>2</sub> = 0.0896             | R <sub>1</sub> = 0.0648, wR <sub>2</sub> = 0.1167              | R <sub>1</sub> = 0.1103, wR <sub>2</sub> = 0.2027              |
| Largest diff. peak/hole / e Å <sup>-3</sup> | 0.81/-0.90                                                    | 1.40/-0.82                                                    | 1.47/-1.28                                                     | 2.19/-1.72                                                     |

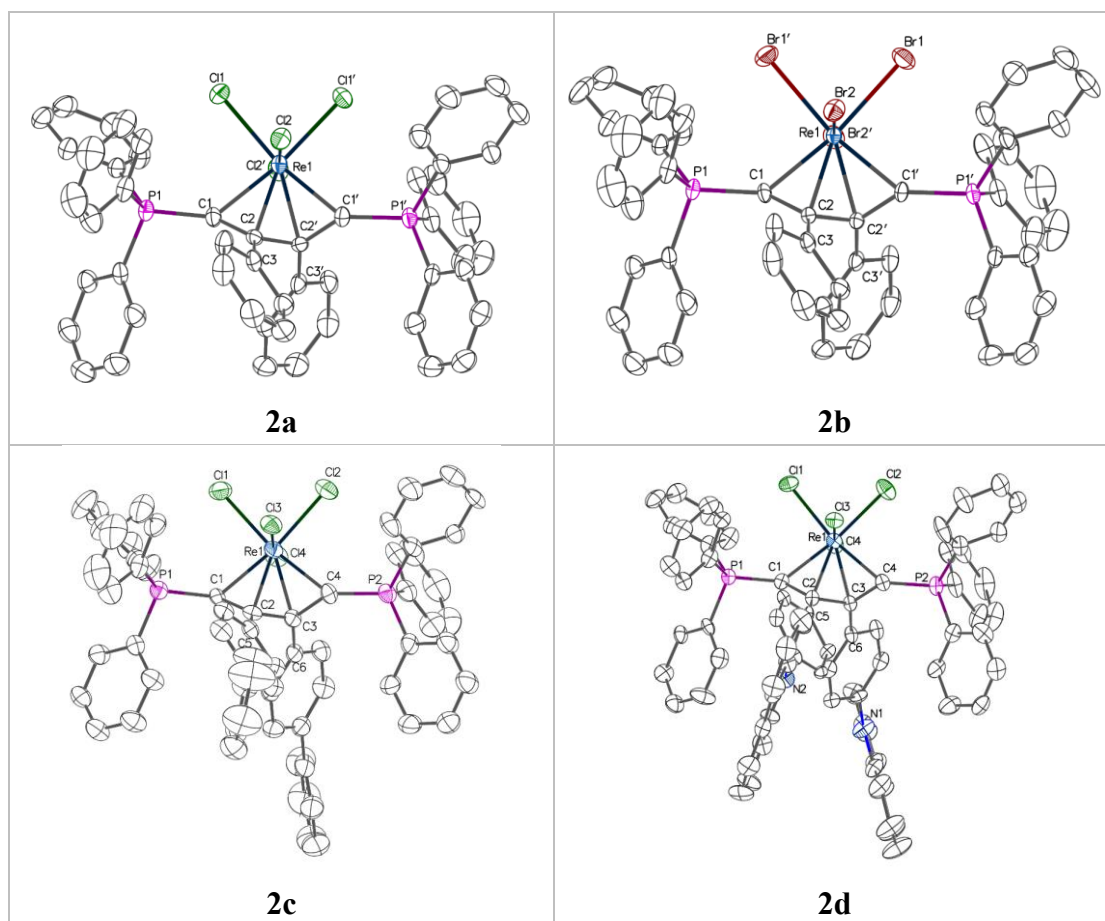

**Figure S2.** The crystal structures of the complexes **2a-d** (ellipsoids at the 40% probability level), presented with an orientation different from that in the main text. The hydrogen atoms are omitted for clarity.



**Table S2.** Selected bond lengths [ $\text{\AA}$ ] and angles [ $^\circ$ ] for the  $\eta^4$ -diene complexes **2a-d**.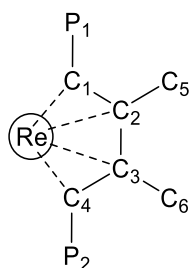

| <i>Compound</i> | <i>M-C1</i>  | <i>M-C2</i>  | <i>M-C3</i>  | <i>M-C4</i>             | <i>C1-C2</i>   | <i>C2-C3</i>   | <i>C3-C4</i> | <i>C1-P1</i> |
|-----------------|--------------|--------------|--------------|-------------------------|----------------|----------------|--------------|--------------|
| <b>2a</b>       | 2.193(3)     | 2.150(3)     | 2.151(3)     | 2.193(3)                | 1.457(4)       | 1.487(6)       | 1.457(4)     | 1.787(3)     |
| <b>2b</b>       | 2.204(3)     | 2.159(3)     | 2.159(3)     | 2.204(3)                | 1.461(5)       | 1.478(6)       | 1.461(5)     | 1.786(3)     |
| <b>2c</b>       | 2.207(4)     | 2.164(4)     | 2.145(4)     | 2.209(5)                | 1.454(6)       | 1.483(6)       | 1.458(6)     | 1.794(4)     |
| <b>2d</b>       | 2.196(8)     | 2.131(8)     | 2.165(8)     | 2.204(8)                | 1.451(9)       | 1.509(9)       | 1.464(10)    | 1.789(8)     |
|                 | <i>C4-P2</i> | <i>C2-C5</i> | <i>C3-C6</i> | <i>C1-C2-<br/>C3-C4</i> | <i>C1-M-C4</i> | <i>C2-M-C3</i> |              |              |
| <b>2a</b>       | 1.787(3)     | 1.493(4)     | 1.493(4)     | 125.9(4)                | 101.82(16)     | 40.46(17)      |              |              |
| <b>2b</b>       | 1.786(3)     | 1.486(5)     | 1.486(5)     | 126.1(4)                | 101.46(18)     | 40.04(18)      |              |              |
| <b>2c</b>       | 1.783(5)     | 1.478(6)     | 1.502(6)     | 126.4(4)                | 101.57(16)     | 40.27(16)      |              |              |
| <b>2d</b>       | 1.773(7)     | 1.514(9)     | 1.455(9)     | 126.4(6)                | 102.2(3)       | 41.1(3)        |              |              |

### 3. Proposed mechanisms for $\text{ReO}_4^-$ production from intermediate **D**.

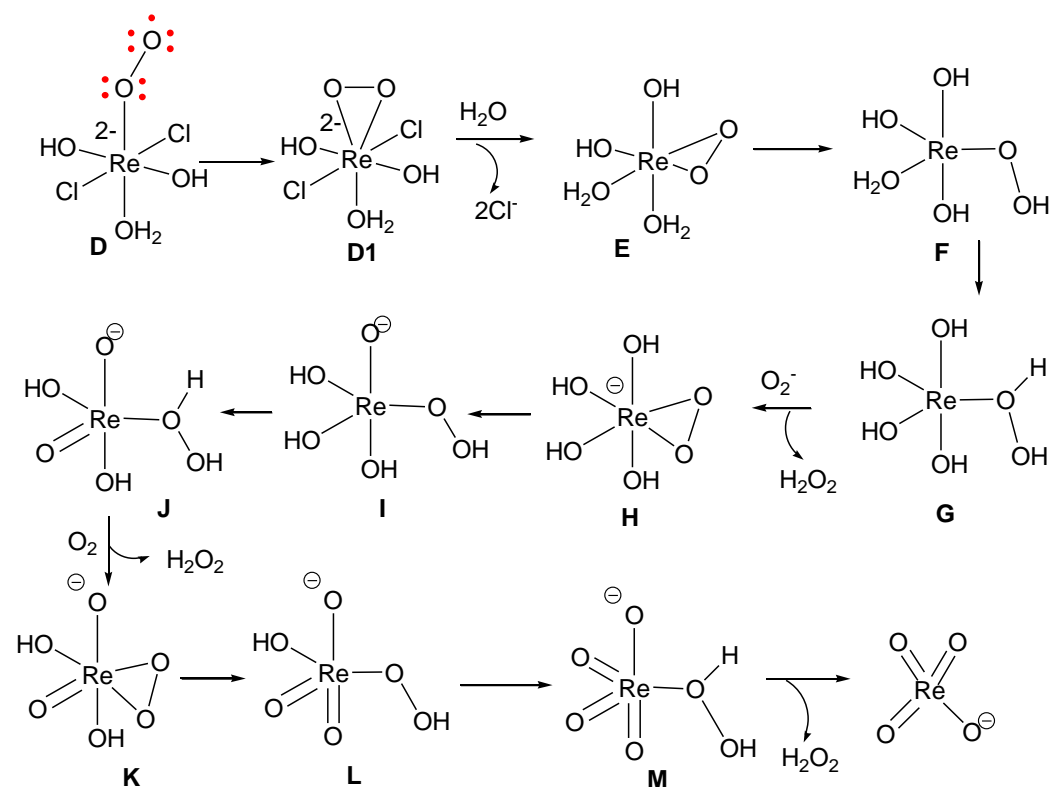

**Scheme S1.** A proposed mechanism for  $\text{ReO}_4^-$  production from intermediate **D**. The key transformation is the reaction of peroxo complexes  $\text{L}_n\text{M}(\text{O}_2)$  with water ( $\text{H}_2\text{O}$ ) to give  $\text{L}_n\text{M}(=\text{O})$  and  $\text{H}_2\text{O}_2$ . It is noted that the reaction of  $\text{MeReO}_2(\eta^2\text{-O}_2)$  with  $\text{H}_2\text{O}$  to give  $\text{MeReO}_3$  (MTO) and  $\text{H}_2\text{O}_2$  have been confirmed experimentally and verified computationally (Scheme S2).<sup>6</sup>

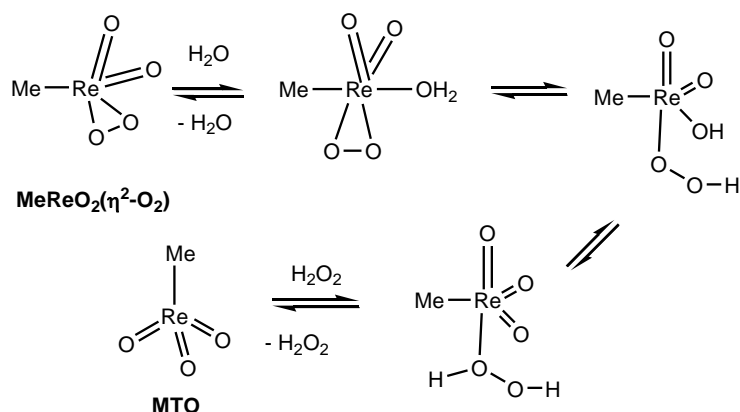

**Scheme S2.** Equilibrium between  $\text{MeReO}_3$  (MTO) and  $\text{MeReO}_2(\eta^2\text{-O}_2)$  in the presence of  $\text{H}_2\text{O}_2$  and  $\text{H}_2\text{O}$ .

## 4. Computational studies.

### General Procedures

All of the calculations were performed using the Gaussian 09 software (rev. D.01),<sup>7</sup> and based on density functional theory with either the restricted B3LYP-D3(BJ) functional (for all singlet species) or otherwise the unrestricted B3LYP-D3(BJ) functional (for all non-singlet species).<sup>8</sup> The basis set def2-TZVP was used to describe all atom<sup>9</sup> with the corresponding effective core potential for Re atom.<sup>10</sup> Solvation effect was also considered using the PCM solvation model with dichloromethane as the solvent.<sup>11</sup> Vibrational frequency of each structure was calculated to confirm that all optimized structures are indeed either a local minimum (with zero imaginary frequencies) or a saddle point (with only one imaginary frequency) of the PES, and to give free energies at standard conditions. Intrinsic reaction coordinate (IRC) calculations<sup>12</sup> were performed to confirm that the transition state connects to two relevant local minima. All reported relative free energies and electronic energies (in parentheses) are in kcal/mol. Optimized structures were visualized and represented by CYLview20.<sup>13</sup>

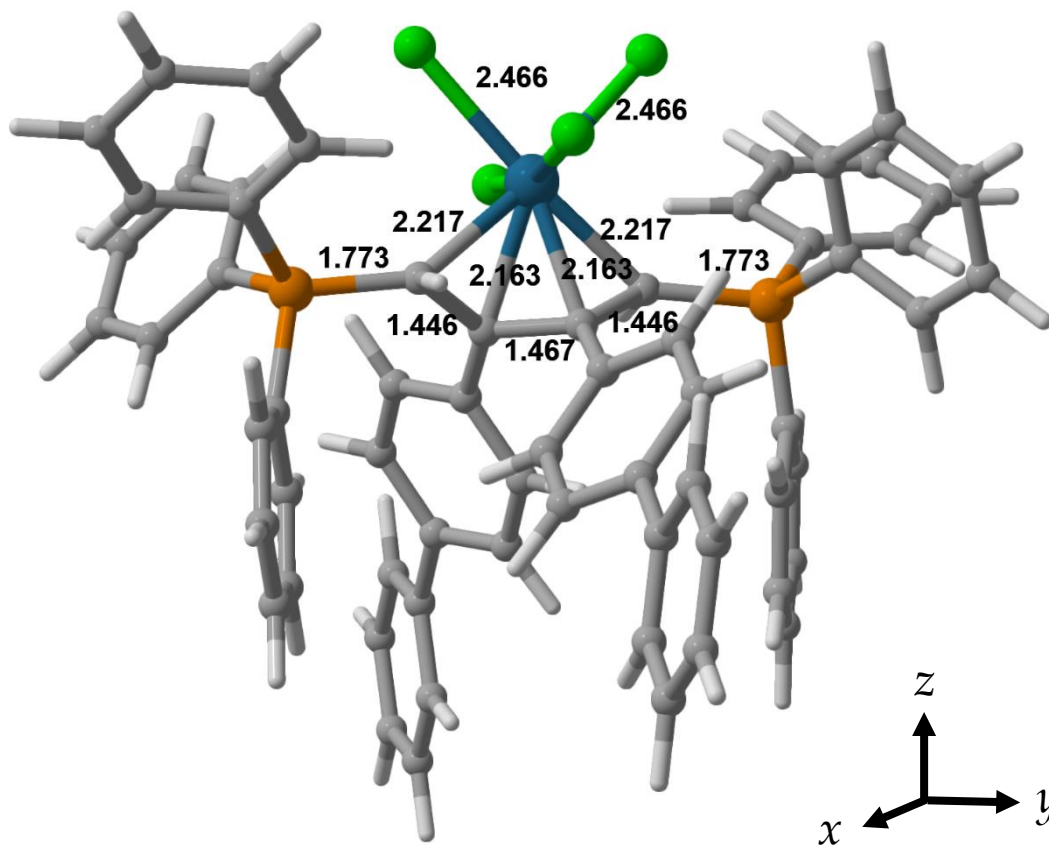

**Figure S3.** Selected bond distances (in Å) in optimized structure of **2c**. The results clearly show that the diene is symmetrically bound to Re and the complex has an C<sub>2</sub> symmetry. The C<sub>2</sub> axis coincides with the z-axis.

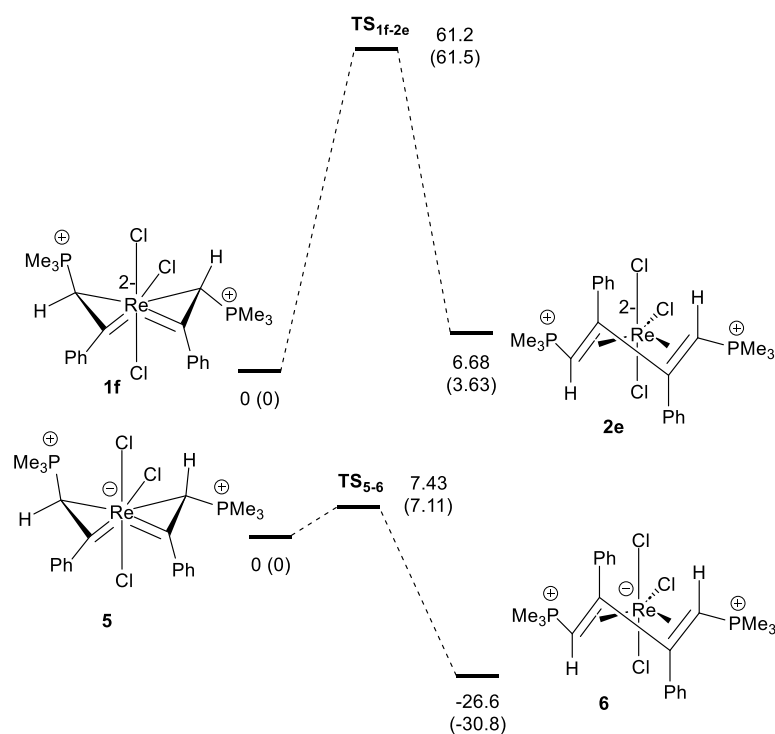

**Figure S4.** Calculated energy profiles for the coupling reactions of the bi(metallacycloprop-1-ene) complexes **1f** and **5**. The relative free energies and electronic energies (in parentheses) are given in kcal/mol. The computational results reveal that oxidation can indeed promote the carbene coupling reaction both kinetically and thermodynamically.

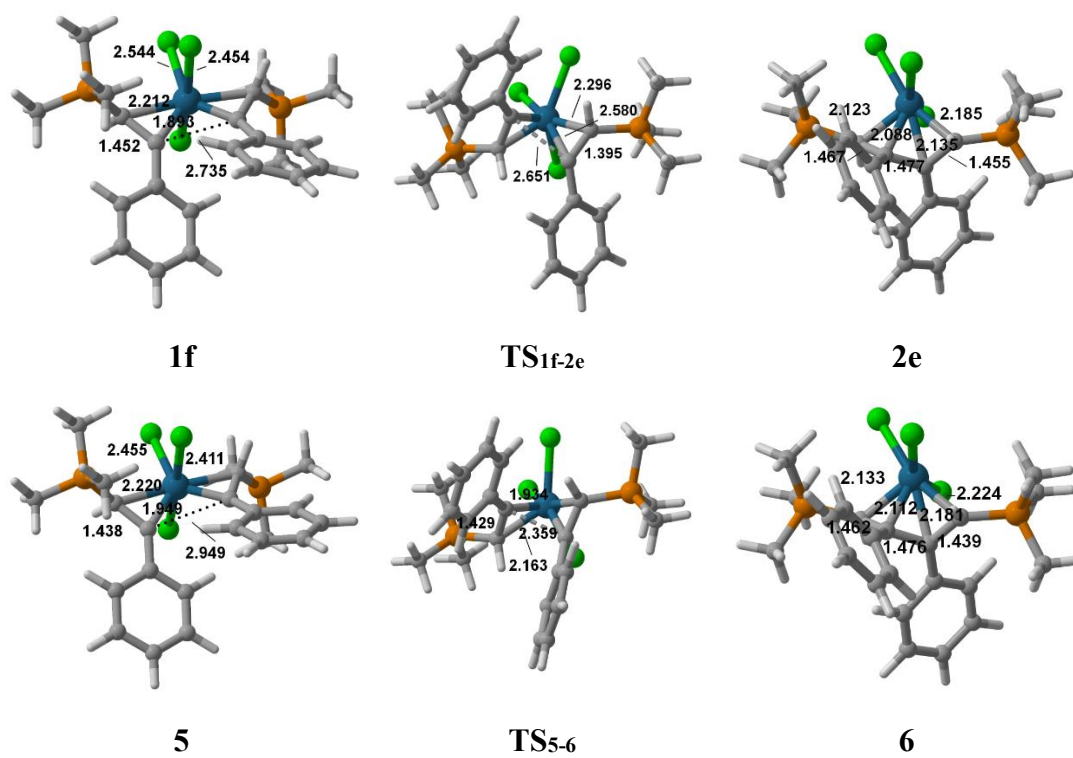

**Figure S5.** DFT-optimized structures and their selected structural parameters (Å) for species in Figure 3.

## 5. Cartesian Coordinates of Calculated Structures

58  
Structure 1f -2998.848291 a.u.

|    |             |             |             |
|----|-------------|-------------|-------------|
| Re | -0.00008100 | 0.86417400  | 0.00008800  |
| C  | -2.12891200 | 0.70838500  | -0.57962200 |
| C  | -1.24609600 | -0.44469900 | -0.56326600 |
| C  | -1.39613200 | -1.74395400 | -1.17039300 |
| C  | -2.66637600 | -2.30679800 | -1.36710700 |
| C  | -2.81088200 | -3.56600300 | -1.93002400 |
| C  | -1.68771500 | -4.27911100 | -2.33772500 |
| C  | -0.42105000 | -3.72023300 | -2.18160800 |
| C  | -0.27547600 | -2.47175500 | -1.60155000 |
| C  | 2.12885500  | 0.70886500  | 0.57963600  |
| C  | 1.24631500  | -0.44442500 | 0.56325200  |
| C  | 1.39662600  | -1.74358600 | 1.17051300  |
| C  | 2.66696900  | -2.30624100 | 1.36711400  |
| C  | 2.81171900  | -3.56529100 | 1.93031400  |
| C  | 1.68870700  | -4.27841700 | 2.33841200  |
| C  | 0.42194700  | -3.71973600 | 2.18235800  |
| C  | 0.27612500  | -2.47142400 | 1.60200200  |
| P  | -3.49332500 | 0.94494300  | 0.49782500  |
| C  | -5.03479900 | 0.85681100  | -0.44555300 |
| C  | -3.50992100 | 2.57371700  | 1.26438300  |
| C  | -3.57762200 | -0.31573400 | 1.78057400  |
| P  | 3.49310700  | 0.94580600  | -0.49793100 |
| C  | 3.50944000  | 2.57476000  | -1.26412400 |
| C  | 5.03472000  | 0.85765200  | 0.44522100  |
| C  | 3.57740100  | -0.31460100 | -1.78094400 |
| Cl | -0.00044800 | 3.40818000  | 0.00049200  |
| Cl | 0.52647700  | 1.13571700  | -2.38164200 |
| Cl | -0.52684400 | 1.13481300  | 2.38190100  |
| H  | -2.36119000 | 1.12811200  | -1.56176900 |
| H  | -3.54324400 | -1.74887100 | -1.07202900 |
| H  | -3.79919900 | -3.98742200 | -2.06112200 |
| H  | -1.79879200 | -5.25861800 | -2.78435500 |
| H  | 0.45423200  | -4.26332800 | -2.51411700 |
| H  | 0.70265200  | -2.03289200 | -1.48239300 |
| H  | 2.36116600  | 1.12851200  | 1.56181100  |
| H  | 3.54372000  | -1.74829500 | 1.07172700  |
| H  | 3.80010800  | -3.98656600 | 2.06133800  |
| H  | 1.79997800  | -5.25778600 | 2.78529500  |
| H  | -0.45321200 | -4.26284800 | 2.51516100  |
| H  | -0.70207200 | -2.03270300 | 1.48288700  |
| H  | -5.88541600 | 1.03896000  | 0.21090200  |
| H  | -5.01618600 | 1.61787000  | -1.22537300 |
| H  | -5.13925900 | -0.12177200 | -0.91076100 |
| H  | -2.62311600 | 2.68280600  | 1.88308200  |
| H  | -3.48952000 | 3.32635800  | 0.47711500  |
| H  | -4.41396600 | 2.69178700  | 1.86157100  |
| H  | -3.70640400 | -1.29459800 | 1.32150800  |
| H  | -2.65350900 | -0.29539700 | 2.35312400  |
| H  | -4.42359700 | -0.10735000 | 2.43522200  |
| H  | 3.48929700  | 3.32721800  | -0.47667200 |
| H  | 4.41329600  | 2.69298400  | -1.86156800 |
| H  | 2.62244100  | 2.68398400  | -1.88252200 |
| H  | 5.88522200  | 1.03998800  | -0.21132900 |
| H  | 5.01614900  | 1.61858100  | 1.22516600  |
| H  | 5.13934100  | -0.12099600 | 0.91025400  |
| H  | 2.65329000  | -0.29417000 | -2.35349100 |
| H  | 4.42338200  | -0.10607800 | -2.43554200 |
| H  | 3.70620200  | -1.29355600 | -1.32207600 |

58  
TS 1f-2e -2998.750279 a.u.

|    |             |             |             |
|----|-------------|-------------|-------------|
| Re | -0.11808200 | -0.77704100 | -0.26497300 |
| C  | -1.26746900 | 0.62833400  | 0.88440200  |
| C  | -1.22892100 | 0.71690000  | -0.55608000 |
| C  | -1.80252600 | 1.64353500  | -1.49610200 |
| C  | -2.50859200 | 2.75895800  | -1.01503600 |
| C  | -3.06401300 | 3.68120900  | -1.88677900 |
| C  | -2.92275400 | 3.51203800  | -3.26148000 |
| C  | -2.21798900 | 2.41673800  | -3.75363700 |
| C  | -1.66255600 | 1.49055000  | -2.88447300 |
| C  | 1.60008800  | 0.47461800  | -1.13196500 |
| C  | 1.29983100  | 1.37293500  | -0.10765100 |
| C  | 2.00432200  | 1.56421500  | 1.15893000  |
| C  | 3.01372700  | 0.76266800  | 1.72914000  |
| C  | 3.62374800  | 1.09120900  | 2.93008700  |
| C  | 3.23550500  | 2.23129700  | 3.62826700  |
| C  | 2.22907600  | 3.03714900  | 3.10677200  |
| C  | 1.63184700  | 2.70462600  | 1.89787100  |
| P  | -2.74100500 | 0.18232400  | 1.76997000  |
| C  | -3.35842300 | 1.64203700  | 2.64132900  |
| C  | -2.43379200 | -1.04505000 | 3.04753100  |
| C  | -4.05602800 | -0.37456300 | 0.67765200  |
| P  | 3.15331900  | -0.38051200 | -1.54206000 |
| C  | 3.16713600  | -0.65332000 | -3.32449500 |
| C  | 4.59652200  | 0.65809900  | -1.21582500 |
| C  | 3.42990600  | -1.99775100 | -0.78335400 |
| Cl | -1.57661500 | -2.71661000 | 0.12415700  |
| Cl | 0.89123100  | -1.46669700 | 1.80328200  |
| Cl | -0.17860700 | -1.58178500 | -2.55147600 |
| H  | -0.69679800 | 1.35133400  | 1.46419100  |
| H  | -2.59279000 | 2.90602000  | 0.05188800  |
| H  | -3.60226300 | 4.53549300  | -1.49693500 |
| H  | -3.35630300 | 4.23111300  | -3.94433300 |
| H  | -2.10351200 | 2.28425400  | -4.82183800 |
| H  | -1.12471800 | 0.63575700  | -3.26453700 |
| H  | 1.17218200  | 0.69228700  | -2.11132500 |
| H  | 3.31276000  | -0.15073800 | 1.24601300  |
| H  | 4.39697500  | 0.44792600  | 3.33232000  |
| H  | 3.70956400  | 2.48387600  | 4.56829400  |
| H  | 1.91326800  | 3.92585300  | 3.63920500  |
| H  | 0.85651500  | 3.33369300  | 1.48031300  |
| H  | -3.67509900 | 2.40156800  | 1.92930000  |
| H  | -4.20615500 | 1.36240000  | 3.26671300  |
| H  | -2.56781100 | 2.04854000  | 3.27113600  |
| H  | -1.65055600 | -0.67320400 | 3.70681400  |
| H  | -3.34685000 | -1.21431900 | 3.61842600  |
| H  | -2.09673600 | -1.96450000 | 2.57610800  |
| H  | -4.93688700 | -0.61814200 | 1.27090800  |
| H  | -4.29759700 | 0.42436400  | -0.02215000 |
| H  | -3.71971400 | -1.25333600 | 0.13307900  |
| H  | 2.31868200  | -1.27845000 | -3.59428700 |
| H  | 3.08058900  | 0.30604400  | -3.83359300 |
| H  | 4.10062400  | -1.13425200 | -3.61586600 |
| H  | 4.47384800  | 1.59568000  | -1.75676100 |
| H  | 4.69623600  | 0.87340900  | -0.15633900 |
| H  | 5.49066500  | 0.14643000  | -1.57222000 |
| H  | 2.71298800  | -2.69974000 | -1.20766700 |
| H  | 4.44302800  | -2.33524500 | -1.00266000 |
| H  | 3.27521200  | -1.95857900 | 0.29177800  |

58

Structure 2e -2998.842506 a.u.

|    |             |             |             |
|----|-------------|-------------|-------------|
| Re | -0.05100700 | -1.09620100 | -0.13029300 |
| C  | -1.17584300 | 0.20644100  | 1.11304000  |
| C  | -0.59363600 | 0.91762500  | -0.03090000 |
| C  | -1.23875800 | 1.83129100  | -0.99973000 |
| C  | -2.40779300 | 1.52139200  | -1.69800300 |
| C  | -2.98730500 | 2.43410400  | -2.56855100 |
| C  | -2.39795400 | 3.67682100  | -2.77967700 |
| C  | -1.21572800 | 3.98902400  | -2.11797300 |
| C  | -0.64458900 | 3.07592800  | -1.23960700 |
| C  | 1.35799900  | 0.24636700  | -1.12316900 |
| C  | 0.87117600  | 0.81266100  | 0.12594900  |
| C  | 1.60337200  | 1.40377200  | 1.25758800  |
| C  | 2.86928600  | 0.98442600  | 1.68151400  |
| C  | 3.51780900  | 1.60025100  | 2.74194300  |
| C  | 2.91188300  | 2.64974500  | 3.42572300  |
| C  | 1.64810700  | 3.07231300  | 3.03142600  |
| C  | 1.00781600  | 2.45969900  | 1.96172500  |
| P  | -2.89320000 | -0.04012800 | 1.46711000  |
| C  | -3.66444500 | 1.54161300  | 1.87614800  |
| C  | -2.94279000 | -1.07857100 | 2.93515700  |
| C  | -3.92169600 | -0.81859700 | 0.20348400  |
| P  | 2.96472900  | -0.30032000 | -1.59218500 |
| C  | 2.81404200  | -0.76152800 | -3.32631900 |
| C  | 4.23642900  | 0.98238000  | -1.50850700 |
| C  | 3.55853100  | -1.76281900 | -0.72316700 |
| Cl | -1.37702300 | -3.11694000 | 0.34839400  |
| Cl | 1.16780300  | -1.83196500 | 1.87824800  |
| Cl | -0.91747000 | -1.40460500 | -2.38805600 |
| H  | -0.70928100 | 0.39174000  | 2.08490800  |
| H  | -2.82920000 | 0.53586300  | -1.60500400 |
| H  | -3.89084200 | 2.16479500  | -3.10113500 |
| H  | -2.84660900 | 4.38585900  | -3.46332300 |
| H  | -0.73678900 | 4.94597300  | -2.28334100 |
| H  | 0.27542500  | 3.32686700  | -0.72878900 |
| H  | 0.90205500  | 0.64951200  | -2.02840500 |
| H  | 3.34735400  | 0.14502600  | 1.20622200  |
| H  | 4.49601500  | 1.24863400  | 3.04480200  |
| H  | 3.41693700  | 3.12762100  | 4.25503300  |
| H  | 1.16042500  | 3.88757000  | 3.55113800  |
| H  | 0.03135700  | 2.80991200  | 1.65673500  |
| H  | -3.62185700 | 2.18987800  | 1.00148700  |
| H  | -4.70375800 | 1.38933100  | 2.16661700  |
| H  | -3.11973800 | 2.00830200  | 2.69599400  |
| H  | -2.34840600 | -0.62141400 | 3.72462200  |
| H  | -3.97244000 | -1.19328700 | 3.27156600  |
| H  | -2.52044800 | -2.04856300 | 2.67679400  |
| H  | -4.66482600 | -1.43434000 | 0.70922400  |
| H  | -4.43195000 | -0.05902600 | -0.38232600 |
| H  | -3.30694500 | -1.44983000 | -0.43317700 |
| H  | 1.99010500  | -1.46738600 | -3.42688000 |
| H  | 2.59882300  | 0.12263200  | -3.92475300 |
| H  | 3.74211600  | -1.21672800 | -3.66932200 |
| H  | 3.89464800  | 1.84735300  | -2.07597600 |
| H  | 4.40498400  | 1.28119600  | -0.47679700 |
| H  | 5.16582200  | 0.60929400  | -1.93875100 |
| H  | 3.02343700  | -2.62923100 | -1.10968900 |
| H  | 4.62585700  | -1.88368300 | -0.90758400 |
| H  | 3.35508600  | -1.69610800 | 0.34280000  |

58

Structure 5 -2998.652670 a.u.

|    |             |             |             |
|----|-------------|-------------|-------------|
| Re | 0.00000300  | 0.81828100  | 0.00014000  |
| C  | -2.17504600 | 0.72492200  | -0.43253300 |
| C  | -1.36481000 | -0.45673300 | -0.55750800 |
| C  | -1.57807700 | -1.69211800 | -1.22314800 |
| C  | -2.87996300 | -2.09024500 | -1.59012200 |
| C  | -3.09165000 | -3.28968200 | -2.24198800 |
| C  | -2.00724300 | -4.10739600 | -2.55735400 |
| C  | -0.70992400 | -3.72316100 | -2.21868000 |
| C  | -0.49480600 | -2.53385100 | -1.55177500 |
| C  | 2.17495400  | 0.72541500  | 0.43251400  |
| C  | 1.36484600  | -0.45636100 | 0.55750500  |
| C  | 1.57840800  | -1.69178200 | 1.22315100  |
| C  | 2.88038100  | -2.08966200 | 1.58998500  |
| C  | 3.09237300  | -3.28903500 | 2.24190800  |
| C  | 2.00817500  | -4.10693300 | 2.55746400  |
| C  | 0.71076200  | -3.72292200 | 2.21893400  |
| C  | 0.49535100  | -2.53367100 | 1.55198500  |
| P  | -3.47140500 | 0.98646800  | 0.74367600  |
| C  | -3.34136600 | 2.58299800  | 1.55789600  |
| C  | -5.04399700 | 1.01999900  | -0.14207600 |
| C  | -3.56837500 | -0.34198400 | 1.95243700  |
| P  | 3.47111500  | 0.98685300  | -0.74393700 |
| C  | 3.34093300  | 2.58327700  | -1.55835800 |
| C  | 5.04391500  | 1.02048900  | 0.14144300  |
| C  | 3.56780300  | -0.34173100 | -1.95258100 |
| Cl | 0.00000800  | 3.27314900  | 0.00008800  |
| Cl | 0.41188600  | 0.91972100  | -2.37287500 |
| Cl | -0.41258900 | 0.91951800  | 2.37293400  |
| H  | -2.47866500 | 1.16151100  | -1.38794500 |
| H  | -3.71336800 | -1.44271900 | -1.36144600 |
| H  | -4.09414000 | -3.58960700 | -2.51505300 |
| H  | -2.17322400 | -5.04433400 | -3.07242600 |
| H  | 0.12657800  | -4.35828300 | -2.47635600 |
| H  | 0.50499100  | -2.22419200 | -1.29167700 |
| H  | 2.47854500  | 1.16226500  | 1.38781800  |
| H  | 3.71364700  | -1.44199400 | 1.36119700  |
| H  | 4.09496000  | -3.58874100 | 2.51486500  |
| H  | 2.17438500  | -5.04381200 | 3.07257000  |
| H  | -0.12561200 | -4.35815700 | 2.47675900  |
| H  | -0.50455300 | -2.22422300 | 1.29203300  |
| H  | -3.32231400 | 3.35805100  | 0.79305100  |
| H  | -4.20521700 | 2.72922900  | 2.20595100  |
| H  | -2.42119200 | 2.62781600  | 2.13259000  |
| H  | -5.84465000 | 1.27419700  | 0.55237300  |
| H  | -4.99963100 | 1.77381700  | -0.92754900 |
| H  | -5.25226700 | 0.04944100  | -0.58856500 |
| H  | -2.66098100 | -0.36276400 | 2.54930300  |
| H  | -4.43126400 | -0.17502700 | 2.59654600  |
| H  | -3.68607100 | -1.29037000 | 1.42974100  |
| H  | 2.42062000  | 2.62804300  | -2.13283700 |
| H  | 3.32207900  | 3.35843800  | -0.79361800 |
| H  | 4.20462600  | 2.72940700  | -2.20664400 |
| H  | 5.84441900  | 1.27452700  | -0.55323800 |
| H  | 4.99977400  | 1.77446000  | 0.92678300  |
| H  | 5.25224200  | 0.05000700  | 0.58807000  |
| H  | 3.68550500  | -1.29007500 | -1.42981100 |
| H  | 2.66029700  | -0.36249200 | -2.54928100 |
| H  | 4.43058900  | -0.17491700 | -2.59686400 |



58  
 TS 5-6 -2998.641331

|    |             |             |             |
|----|-------------|-------------|-------------|
| Re | 0.00887800  | -1.05594300 | -0.40838500 |
| C  | -1.16277200 | -0.16927200 | 1.17937000  |
| C  | -0.95703900 | 0.57467600  | -0.02358300 |
| C  | -1.22750800 | 1.90657300  | -0.45160200 |
| C  | -1.54461300 | 2.88269200  | 0.51489000  |
| C  | -1.72909200 | 4.20115500  | 0.14355900  |
| C  | -1.61715400 | 4.56930700  | -1.19630200 |
| C  | -1.31612300 | 3.61480500  | -2.16362700 |
| C  | -1.11720400 | 2.29324800  | -1.80056200 |
| C  | 1.52410200  | 0.38438900  | -1.11259100 |
| C  | 1.37594100  | 0.40063200  | 0.27893800  |
| C  | 1.73619300  | 1.20995800  | 1.37055100  |
| C  | 1.57481000  | 0.80370300  | 2.71771400  |
| C  | 1.91667400  | 1.65168800  | 3.75576000  |
| C  | 2.43617100  | 2.91918500  | 3.49673200  |
| C  | 2.62178600  | 3.33119000  | 2.17601100  |
| C  | 2.28228600  | 2.49741000  | 1.12922400  |
| P  | -2.80942700 | -0.70113000 | 1.63377700  |
| C  | -3.49851700 | 0.55884700  | 2.72456100  |
| C  | -2.76441700 | -2.22888200 | 2.57268900  |
| C  | -3.88712700 | -0.80556200 | 0.20243200  |
| P  | 3.02859200  | -0.21414000 | -1.87714200 |
| C  | 2.84484300  | -0.07899500 | -3.65663500 |
| C  | 4.40281700  | 0.82183500  | -1.34952300 |
| C  | 3.42643000  | -1.91161300 | -1.45710400 |
| Cl | -1.38590200 | -3.05338400 | -0.46632200 |
| Cl | 1.18038000  | -2.39144200 | 1.25437800  |
| Cl | -0.57581100 | -1.01107800 | -2.73851400 |
| H  | -0.62275300 | 0.12268700  | 2.07887400  |
| H  | -1.60489400 | 2.59741600  | 1.55560600  |
| H  | -1.95636500 | 4.94634400  | 0.89376400  |
| H  | -1.76742700 | 5.60105800  | -1.48532900 |
| H  | -1.23995800 | 3.90354000  | -3.20328600 |
| H  | -0.91186400 | 1.54197900  | -2.54816500 |
| H  | 1.10731800  | 1.18339100  | -1.73025400 |
| H  | 1.23291800  | -0.19943200 | 2.92390500  |
| H  | 1.79359200  | 1.31863800  | 4.77830300  |
| H  | 2.70407100  | 3.57537000  | 4.31388900  |
| H  | 3.02659700  | 4.31331300  | 1.96819300  |
| H  | 2.40668300  | 2.82960600  | 0.10760400  |
| H  | -3.64302900 | 1.48586700  | 2.17375500  |
| H  | -4.46115300 | 0.21332000  | 3.10154300  |
| H  | -2.82609300 | 0.73265200  | 3.56357100  |
| H  | -2.10921600 | -2.09035900 | 3.43235000  |
| H  | -3.77089500 | -2.46195400 | 2.91911900  |
| H  | -2.38142500 | -3.02895100 | 1.94576700  |
| H  | -4.89300400 | -1.05680700 | 0.53736800  |
| H  | -3.90381500 | 0.16611400  | -0.29069500 |
| H  | -3.52049900 | -1.56285600 | -0.48461800 |
| H  | 1.99860800  | -0.68764000 | -3.97037600 |
| H  | 2.66260000  | 0.95993600  | -3.92818600 |
| H  | 3.75724000  | -0.42613500 | -4.14015600 |
| H  | 4.21098500  | 1.85574700  | -1.63187500 |
| H  | 4.50814500  | 0.75634700  | -0.26754300 |
| H  | 5.32063700  | 0.47992500  | -1.82756900 |
| H  | 4.41012300  | -2.14725000 | -1.86246100 |
| H  | 3.42950000  | -2.03368900 | -0.37565400 |
| H  | 2.68700400  | -2.58397600 | -1.88967200 |

58  
 Structure 6 -2998.701749 a.u.

|    |             |             |             |
|----|-------------|-------------|-------------|
| Re | -0.10678200 | -1.09812900 | -0.44885800 |
| C  | -1.22059700 | -0.06664800 | 1.04981900  |
| C  | -0.57559400 | 0.87566900  | 0.13731800  |
| C  | -1.14209100 | 2.00575600  | -0.62967700 |
| C  | -2.32589700 | 1.93467300  | -1.36617200 |
| C  | -2.81835600 | 3.04777800  | -2.03102800 |
| C  | -2.12761100 | 4.25467600  | -1.98676300 |
| C  | -0.93535900 | 4.33441400  | -1.27795900 |
| C  | -0.44756800 | 3.22027200  | -0.60693400 |
| C  | 1.42627300  | 0.42011900  | -0.98791200 |
| C  | 0.87844300  | 0.69197500  | 0.31480000  |
| C  | 1.54928500  | 0.95652400  | 1.59930700  |
| C  | 2.78352700  | 0.41314300  | 1.96554000  |
| C  | 3.39054500  | 0.75622000  | 3.16396200  |
| C  | 2.77315400  | 1.64932100  | 4.03353200  |
| C  | 1.54210000  | 2.19411600  | 3.69025500  |
| C  | 0.93933000  | 1.85284800  | 2.48712500  |
| P  | -2.96352600 | -0.25705400 | 1.40625200  |
| C  | -3.53069100 | 1.27620500  | 2.16160000  |
| C  | -3.05639300 | -1.58175500 | 2.61529900  |
| C  | -4.07560000 | -0.66488100 | 0.04985900  |
| P  | 3.07366600  | 0.04712900  | -1.54782800 |
| C  | 2.93382100  | 0.01066700  | -3.33987500 |
| C  | 4.22712300  | 1.35771200  | -1.10737500 |
| C  | 3.75112200  | -1.54468200 | -1.05517300 |
| Cl | -1.52379000 | -3.02881200 | -0.47224200 |
| Cl | 1.21214700  | -2.30865900 | 1.10723200  |
| Cl | -0.88816600 | -0.70318800 | -2.66980700 |
| H  | -0.72434200 | -0.18571800 | 2.01283600  |
| H  | -2.83585400 | 0.99306200  | -1.47385300 |
| H  | -3.73368100 | 2.96639900  | -2.60241900 |
| H  | -2.50973600 | 5.12039500  | -2.51124800 |
| H  | -0.38255600 | 5.26408600  | -1.24485500 |
| H  | 0.47878900  | 3.29352900  | -0.05373400 |
| H  | 0.96729300  | 0.98453600  | -1.79500700 |
| H  | 3.26717100  | -0.30965600 | 1.33285800  |
| H  | 4.34527800  | 0.31775900  | 3.42262100  |
| H  | 3.24795700  | 1.91733700  | 4.96793900  |
| H  | 1.05228600  | 2.89472100  | 4.35370400  |
| H  | -0.00765500 | 2.30300000  | 2.22361200  |
| H  | -3.45421400 | 2.08308700  | 1.43366800  |
| H  | -4.56782100 | 1.16744400  | 2.47763800  |
| H  | -2.90701500 | 1.50628000  | 3.02436700  |
| H  | -2.42723900 | -1.34195400 | 3.47097900  |
| H  | -4.08835900 | -1.69920400 | 2.94355600  |
| H  | -2.70757100 | -2.50265900 | 2.15024700  |
| H  | -4.93259200 | -1.18088000 | 0.48272100  |
| H  | -4.42426600 | 0.23772500  | -0.44294000 |
| H  | -3.58115600 | -1.32528600 | -0.65831300 |
| H  | 2.19224200  | -0.73371400 | -3.62648000 |
| H  | 2.61706700  | 0.98804500  | -3.70051100 |
| H  | 3.89882800  | -0.24265900 | -3.77632000 |
| H  | 3.83820600  | 2.30267100  | -1.48549300 |
| H  | 4.33552000  | 1.42015000  | -0.02696600 |
| H  | 5.19620000  | 1.15466900  | -1.56255900 |
| H  | 4.72599300  | -1.65164000 | -1.53129400 |
| H  | 3.86250200  | -1.62848100 | 0.02058800  |
| H  | 3.08853800  | -2.33747200 | -1.39689700 |

|                                |             |             |             |    |             |
|--------------------------------|-------------|-------------|-------------|----|-------------|
| 121                            |             |             |             |    |             |
| Structure 2c -5072.402895 a.u. |             |             |             |    |             |
| Re                             | 0.00000000  | 0.00000000  | 2.08672300  |    |             |
| C                              | -1.24133900 | 1.15855200  | 0.66050700  | C  | -4.10613000 |
| C                              | 0.00000000  | 0.73340300  | 0.05215800  | C  | -3.16108000 |
| C                              | 1.00768800  | 1.48004500  | -0.72969200 | C  | -1.88891300 |
| C                              | 1.45680600  | 2.77168800  | -0.44528000 | C  | -1.55701800 |
| C                              | 2.35334900  | 3.41734200  | -1.27952800 | Cl | 1.00495400  |
| C                              | 2.86258800  | 2.79576000  | -2.42508700 | Cl | -1.00495400 |
| C                              | 2.43820500  | 1.49205100  | -2.69520500 | Cl | 1.92520200  |
| C                              | 1.53226900  | 0.85191600  | -1.86639800 | Cl | -1.92520200 |
| C                              | 3.82340200  | 3.48481400  | -3.31090100 | H  | 2.07181800  |
| C                              | 4.79329500  | 4.34759900  | -2.78811200 | H  | -1.11795500 |
| C                              | 5.70055000  | 4.98866800  | -3.62110700 | H  | -2.65695700 |
| C                              | 5.65680700  | 4.78282300  | -4.99601000 | H  | -2.83416600 |
| C                              | 4.69689100  | 3.92933800  | -5.52973300 | H  | -1.22645100 |
| C                              | 3.79119800  | 3.28712200  | -4.69602700 | H  | -4.85275000 |
| C                              | 1.24133900  | -1.15855200 | 0.66050700  | H  | -6.44868000 |
| C                              | 0.00000000  | -0.73340300 | 0.05215800  | H  | -6.36388000 |
| C                              | -1.00768800 | -1.48004500 | -0.72969200 | H  | -4.64888700 |
| C                              | -1.45680600 | -2.77168800 | -0.44528000 | H  | -3.03738500 |
| C                              | -2.35334900 | -3.41734200 | -1.27952800 | H  | -2.07181800 |
| C                              | -2.86258800 | -2.79576000 | -2.42508700 | H  | 1.11795500  |
| C                              | -2.43820500 | -1.49205100 | -2.69520500 | H  | 2.65695700  |
| C                              | -1.53226900 | -0.85191600 | -1.86639800 | H  | 4.42715700  |
| C                              | -3.82340200 | -3.48481400 | -3.31090100 | H  | 2.83416600  |
| C                              | -4.79329500 | -4.34759900 | -2.78811200 | H  | 0.96053600  |
| C                              | -5.70055000 | -4.98866800 | -3.62110700 | H  | 1.22645100  |
| C                              | -5.65680700 | -4.78282300 | -4.99601000 | H  | -0.15498500 |
| C                              | -4.69689100 | -3.92933800 | -5.52973300 | H  | 4.85275000  |
| C                              | -3.79119800 | -3.28712200 | -4.69602700 | H  | 4.49829000  |
| P                              | 2.02247500  | -2.74226900 | 0.50335800  | H  | 6.44868000  |
| C                              | 3.52280100  | -2.74454800 | 1.49202000  | H  | 5.64436200  |
| C                              | 3.96636600  | -1.60285800 | 2.15761100  | H  | 5.28260600  |
| C                              | 5.14794000  | -1.65259000 | 2.88656100  | H  | 5.64436200  |
| C                              | 5.88283400  | -2.82978000 | 2.95314300  | H  | 3.76799000  |
| C                              | 5.43674800  | -3.97083500 | 2.29172200  | H  | 2.64008500  |
| C                              | 4.25794700  | -3.93191000 | 1.56354000  | H  | -0.68843400 |
| C                              | 1.10129600  | -4.22510000 | 0.91938900  | H  | 5.48570400  |
| C                              | 0.41173300  | -4.27068100 | 2.13450800  | H  | 6.80022200  |
| C                              | -0.28841800 | -5.41621600 | 2.48079500  | H  | 6.00322700  |
| C                              | -0.29599200 | -6.51842700 | 1.63149500  | H  | -4.89060300 |
| C                              | 0.40983900  | -6.48044600 | 0.43450000  | H  | 3.90934100  |
| C                              | 1.11185000  | -5.33766300 | 0.07560300  | H  | 0.41102900  |
| C                              | 2.50555800  | -2.78464900 | -1.23888400 | H  | -0.83395300 |
| C                              | 3.78233700  | -2.35165000 | -1.60105000 | H  | -5.44350700 |
| C                              | 4.10613000  | -2.18461500 | -2.94119100 | H  | 0.84912100  |
| C                              | 3.16108000  | -2.44693300 | -3.92533200 | H  | -0.41314400 |
| C                              | 1.88891300  | -2.88330300 | -3.56867200 | H  | -0.84912100 |
| C                              | 1.55701800  | -3.05050600 | -2.23241700 | H  | 7.33851000  |
| P                              | -2.02247500 | 2.74226900  | 0.50335800  | H  | -1.65573000 |
| C                              | -1.10129600 | 4.22510000  | 0.91938900  | H  | 5.31697600  |
| C                              | -0.41173300 | 4.27068100  | 2.13450800  | H  | -3.39268800 |
| C                              | 0.28841800  | 5.41621600  | 2.48079500  | H  | 0.68843400  |
| C                              | 0.29599200  | 6.51842700  | 1.63149500  | H  | -5.48570400 |
| C                              | -0.40983900 | 6.48044600  | 0.43450000  | H  | 0.76863400  |
| C                              | -1.11185000 | 5.33766300  | 0.07560300  | H  | 2.86308400  |
| C                              | -3.52280100 | 2.74454800  | 1.49202000  | H  | -6.80022200 |
| C                              | -3.96636600 | 1.60285800  | 2.15761100  | H  | 4.89060300  |
| C                              | -5.14794000 | 1.65259000  | 2.88656100  | H  | -3.90934100 |
| C                              | -5.88283400 | 2.82978000  | 2.95314300  | H  | 4.82351200  |
| C                              | -5.43674800 | 3.97083500  | 2.29172200  | H  | -4.51859200 |
| C                              | -4.25794700 | 3.93191000  | 1.56354000  | H  | -5.09586500 |
| C                              | -2.50555800 | 2.78464900  | -1.23888400 | H  | -3.41370500 |
| C                              | -3.78233700 | 2.35165000  | -1.60105000 | H  | 2.31105600  |
|                                |             |             |             | H  | 1.14859300  |
|                                |             |             |             | H  | 0.55957200  |
|                                |             |             |             | H  | 3.36786200  |
|                                |             |             |             | H  | -0.41102900 |
|                                |             |             |             | H  | 3.41237000  |
|                                |             |             |             | H  | 0.83395300  |
|                                |             |             |             | H  | 5.44350700  |
|                                |             |             |             | H  | 0.84912100  |
|                                |             |             |             | H  | 7.40762600  |
|                                |             |             |             | H  | 1.90402900  |
|                                |             |             |             | H  | -0.22412600 |
|                                |             |             |             | H  | 1.90402900  |
|                                |             |             |             | H  | -0.85709900 |
|                                |             |             |             | H  | 2.13639900  |
|                                |             |             |             | H  | 3.41058600  |
|                                |             |             |             | H  | 3.52614800  |
|                                |             |             |             | H  | 2.34842900  |
|                                |             |             |             | H  | 1.05887800  |
|                                |             |             |             | H  | -0.84078800 |
|                                |             |             |             | H  | -3.21301400 |
|                                |             |             |             | H  | -4.96858800 |
|                                |             |             |             | H  | -4.33041200 |
|                                |             |             |             | H  | -1.96927700 |
|                                |             |             |             | H  | 2.79220600  |
|                                |             |             |             | H  | 3.41440000  |
|                                |             |             |             | H  | 1.90402900  |
|                                |             |             |             | H  | -0.22412600 |
|                                |             |             |             | H  | 0.85709900  |
|                                |             |             |             | H  | 2.13639900  |
|                                |             |             |             | H  | 3.41058600  |
|                                |             |             |             | H  | 3.52614800  |
|                                |             |             |             | H  | 2.34842900  |
|                                |             |             |             | H  | 1.05887800  |
|                                |             |             |             | H  | -0.84078800 |
|                                |             |             |             | H  | -3.21301400 |
|                                |             |             |             | H  | -4.96858800 |
|                                |             |             |             | H  | -4.33041200 |
|                                |             |             |             | H  | -1.96927700 |

## 6. NMR and MS spectra

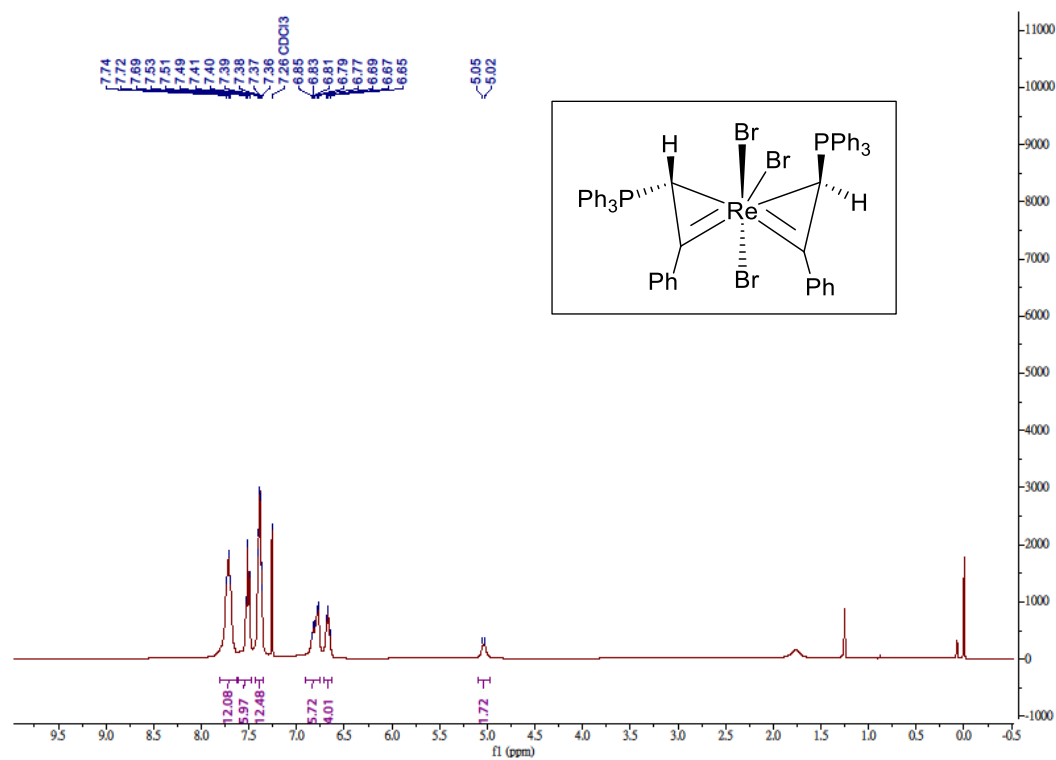

Figure S6. The  $^1\text{H}$  NMR spectrum of **1b** in  $\text{CDCl}_3$  at 400 MHz.

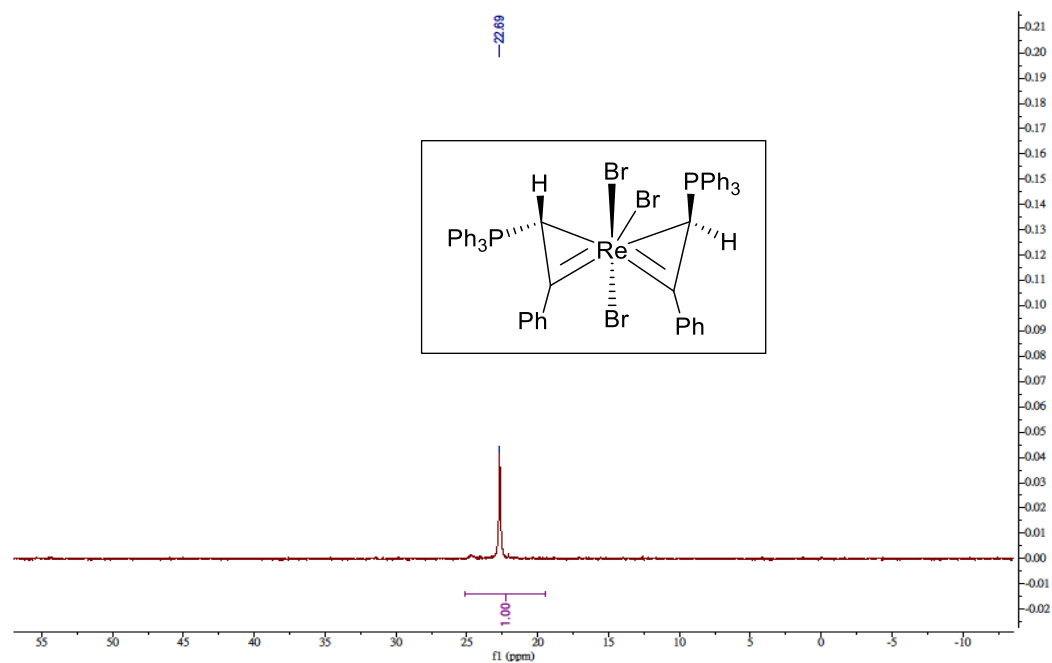

Figure S7. The  $^{31}\text{P}\{^1\text{H}\}$  NMR spectrum of **1b** in  $\text{CDCl}_3$  at 243 MHz.

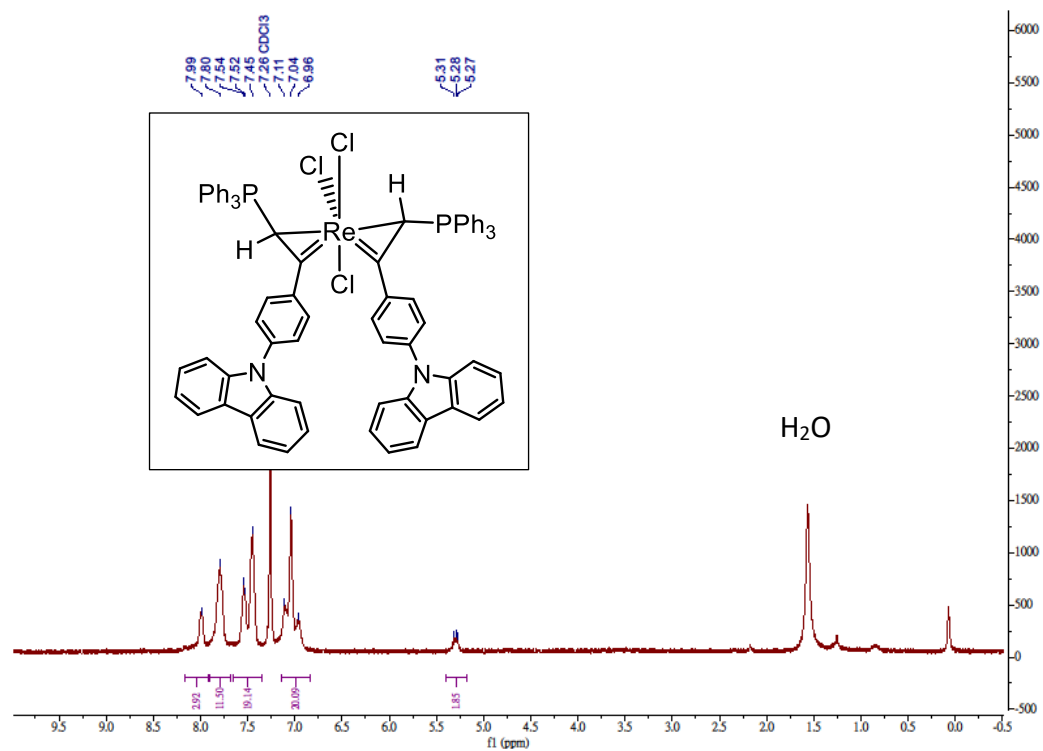

**Figure S8.** The  $^1\text{H}$  NMR spectrum of the complex **1d** in  $\text{CDCl}_3$  at 400 MHz.

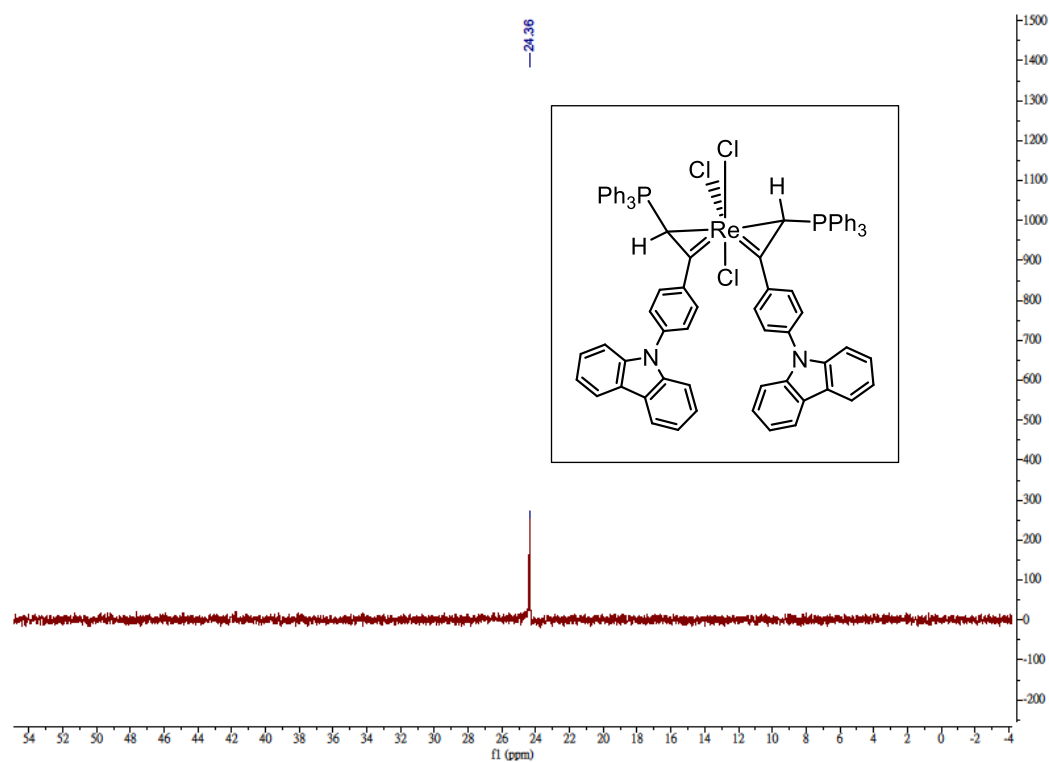

**Figure S9.** The  $^{31}\text{P}\{^1\text{H}\}$  NMR spectrum of the complex **1d** in  $\text{CDCl}_3$  at 162 MHz.

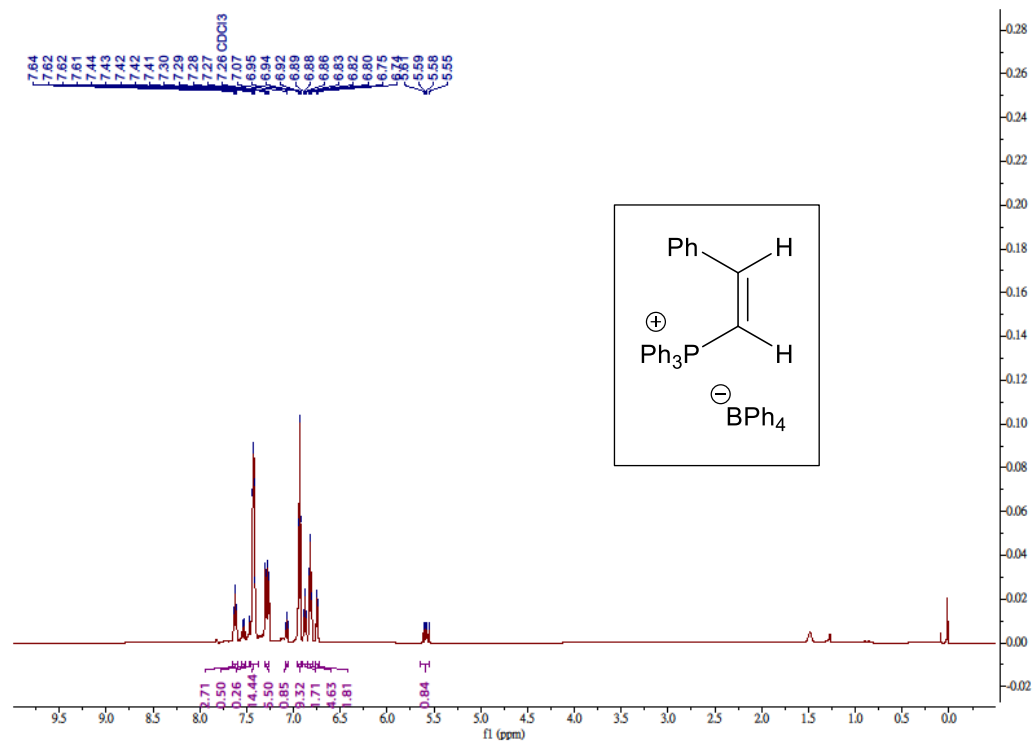

Figure S10. The  $^1\text{H}$  NMR spectrum of  $3\text{a}[\text{BPh}_4]$  in  $\text{CDCl}_3$  at 600 MHz.

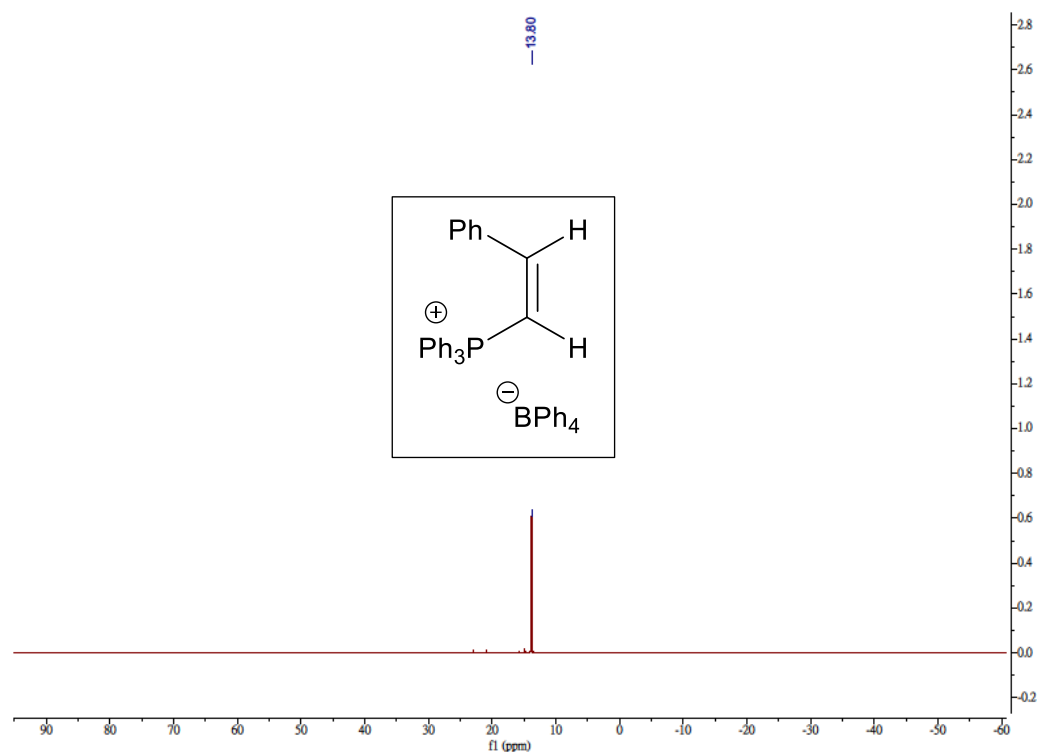

Figure S11. The  $^{31}\text{P}\{^1\text{H}\}$  NMR spectrum of  $3\text{a}[\text{BPh}_4]$  in  $\text{CDCl}_3$  at 243 MHz.

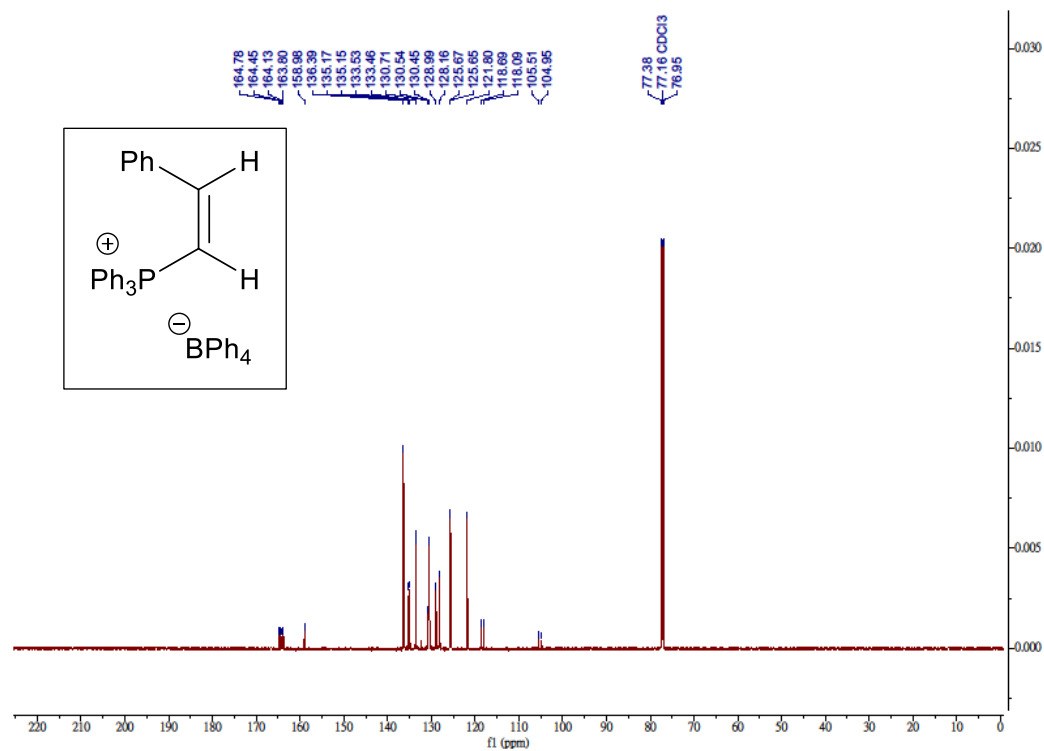

Figure S12. The  $^{13}\text{C}\{^1\text{H}\}$  NMR spectrum of  $3\text{a}[\text{BPh}_4]$  in  $\text{CDCl}_3$  at 151 MHz.

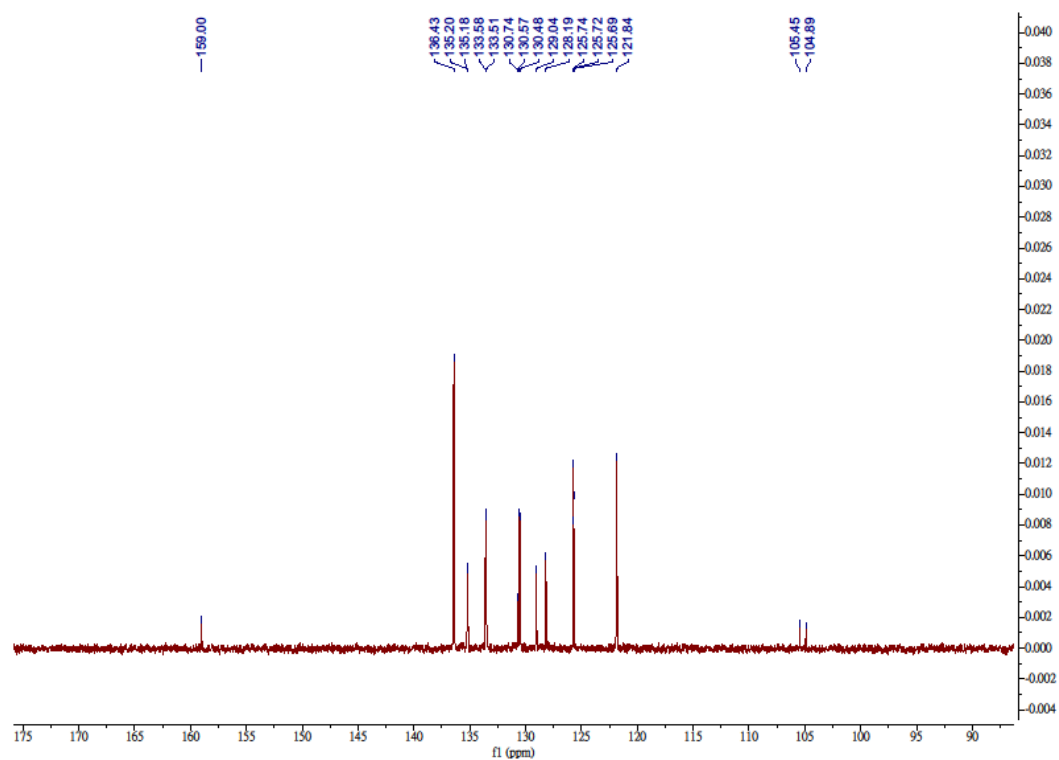

Figure S13. The DEPT-135 NMR spectrum of  $3\text{a}[\text{BPh}_4]$  in  $\text{CDCl}_3$  in 151 MHz.

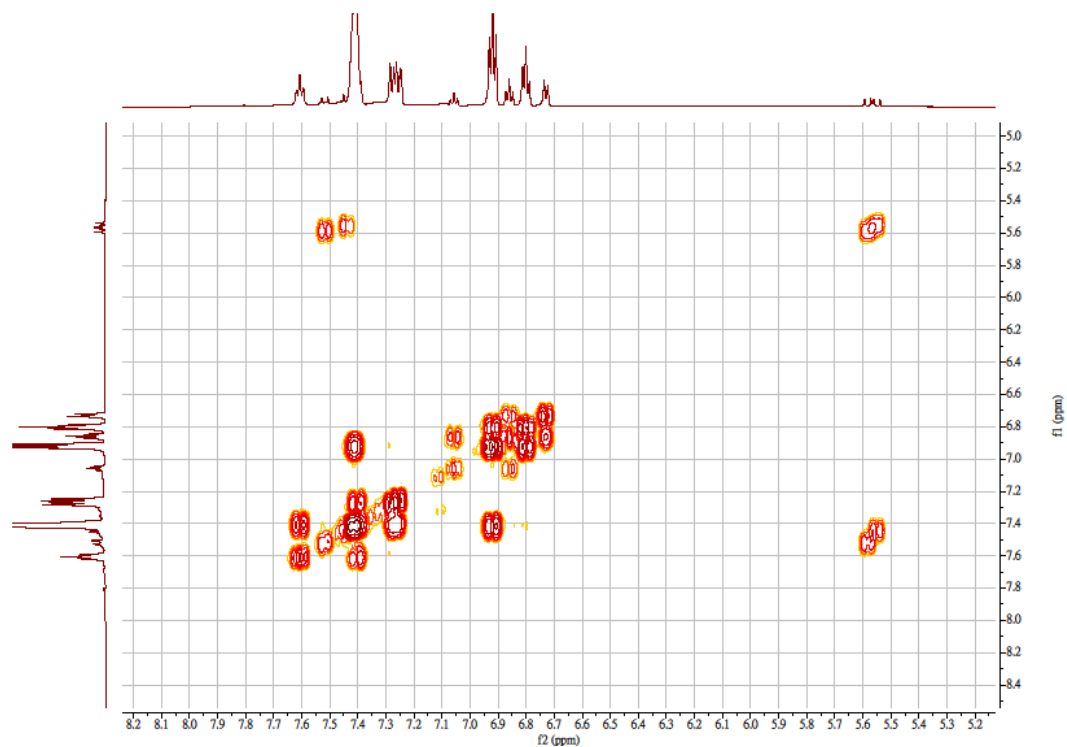

Figure S14. The  $^1\text{H}$ - $^1\text{H}$  COSY NMR spectrum of  $3\text{a}[\text{BPh}_4]$  in  $\text{CDCl}_3$ .

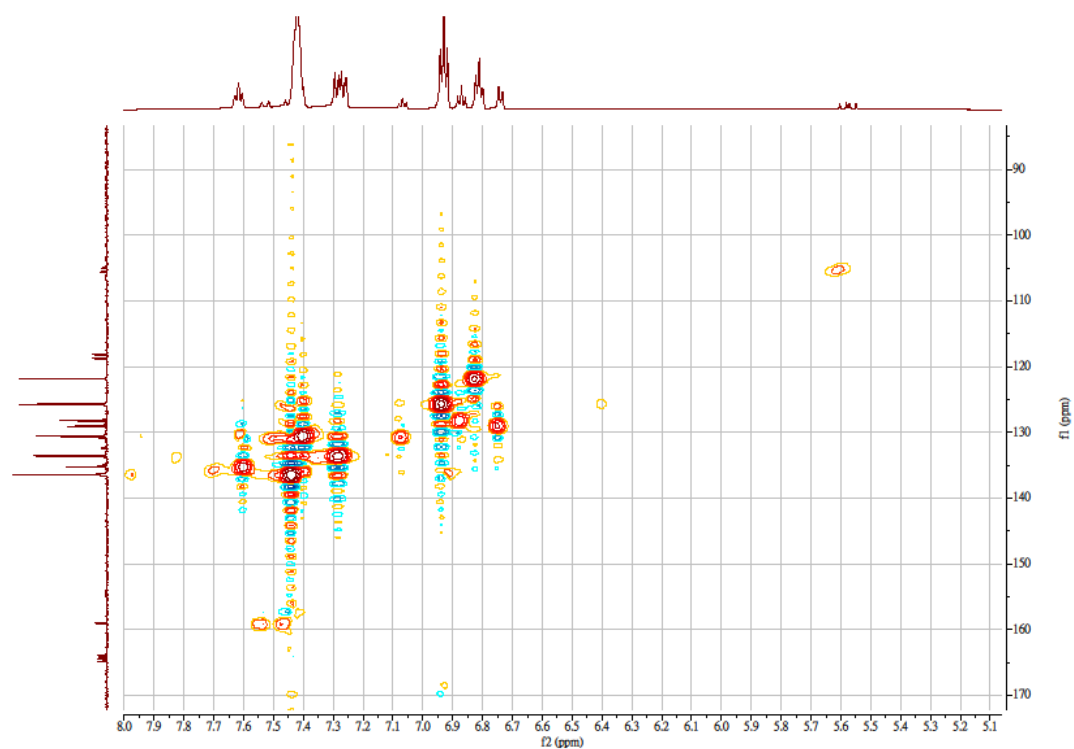

Figure S15. The  $^{13}\text{C}$ - $^1\text{H}$  HSQC NMR spectrum of  $3\text{a}[\text{BPh}_4]$  in  $\text{CDCl}_3$ .

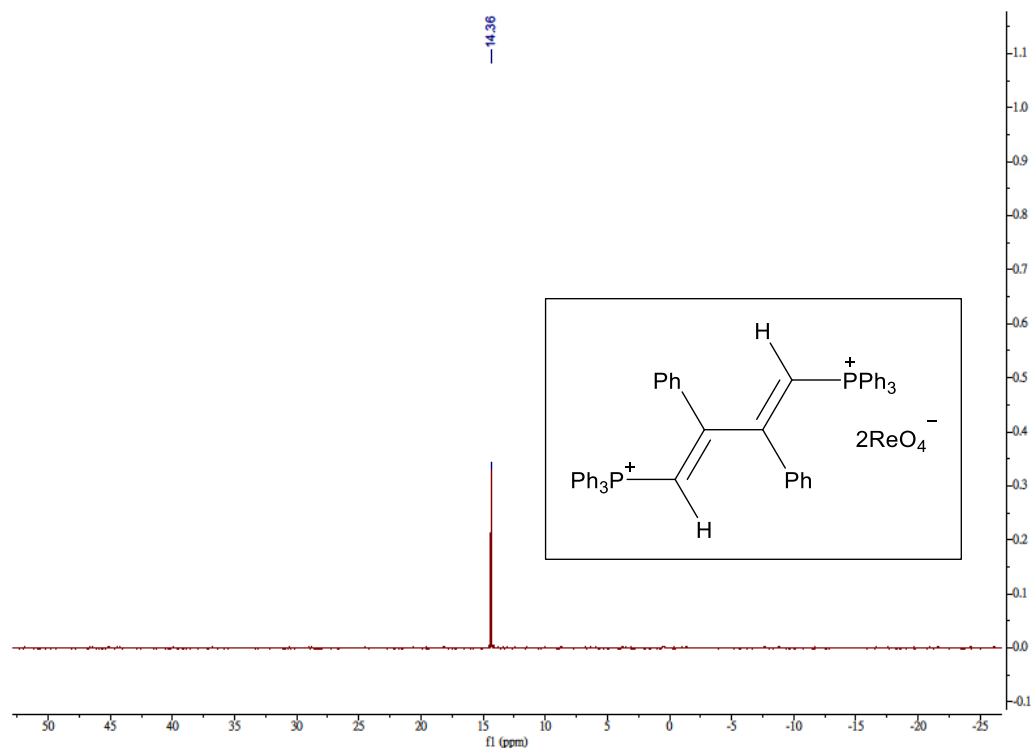

Figure S16. The  $^{31}\text{P}\{^1\text{H}\}$  NMR spectrum of  $4\text{a}(\text{ReO}_4)_2$  in  $\text{CD}_2\text{Cl}_2$  at 243 MHz.

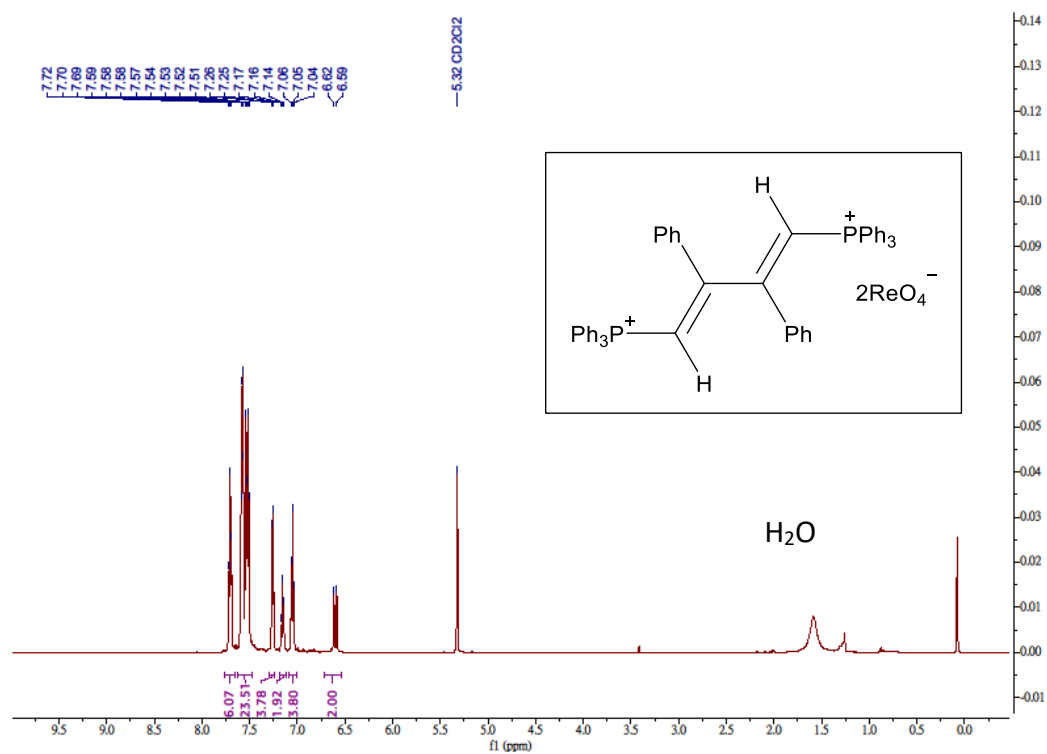

Figure S17. The  $^1\text{H}$  NMR spectrum of  $4\text{a}(\text{ReO}_4)_2$  in  $\text{CD}_2\text{Cl}_2$  at 600 MHz.



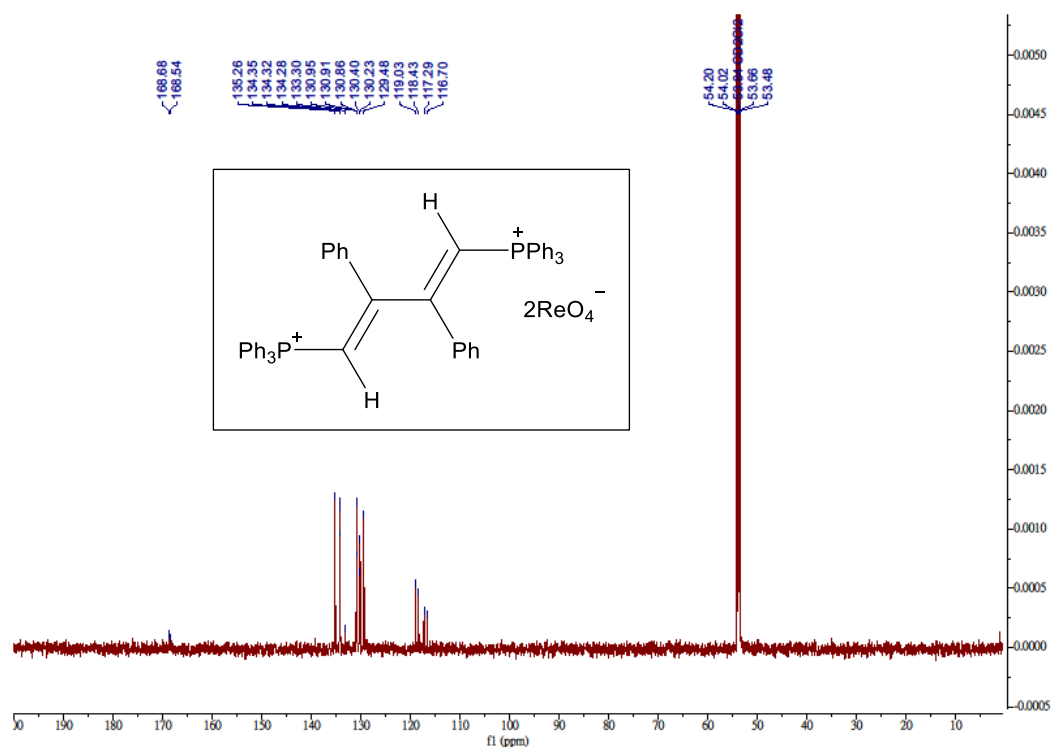

**Figure S18.** The  $^{13}\text{C}\{^1\text{H}\}$  NMR spectrum of  $4a[\text{ReO}_4]_2$  in  $\text{CD}_2\text{Cl}_2$  at 101 MHz.

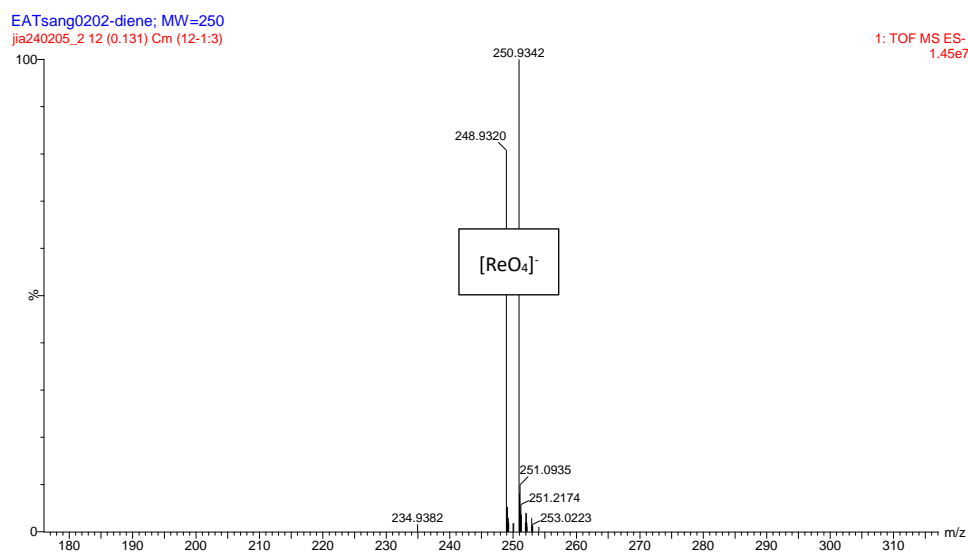

EATsang0202-diene; MW=346  
jia240205\_1 11 (0.123) Cm (11-1:7)

1: TOF MS ES+  
5.60e6

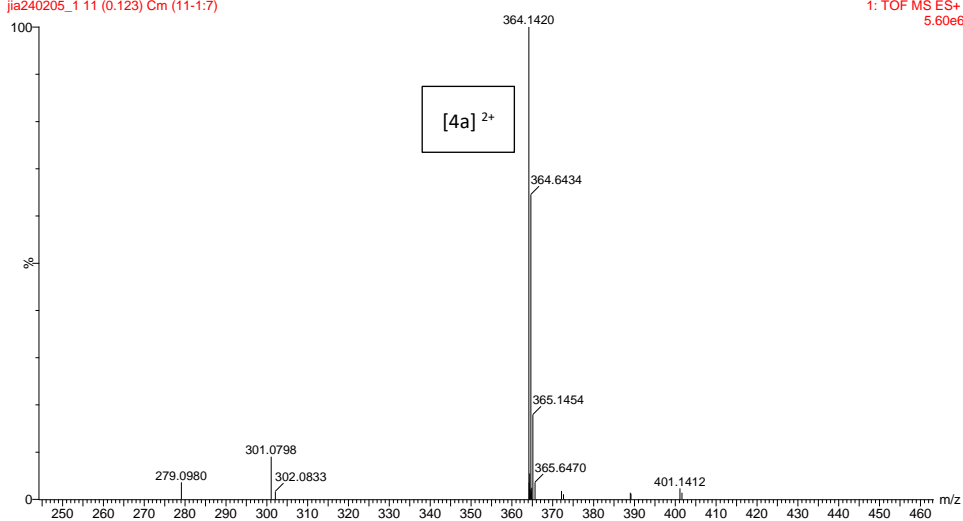

**Figure S19.** The mass spectra of  $4a[ReO_4]_2$  in negative (top) and positive (below) modes. Calculated  $m/z$ :  $ReO_4^-$ , 250.9360;  $1/2[(Ph_3P)CH=C(Ph)-C(Ph)=CH(PPh_3)]^{2+}$  ( $1/2[C_{52}H_{42}P_2]^{2+}$ ,  $4a/2$ ), 364.1375.

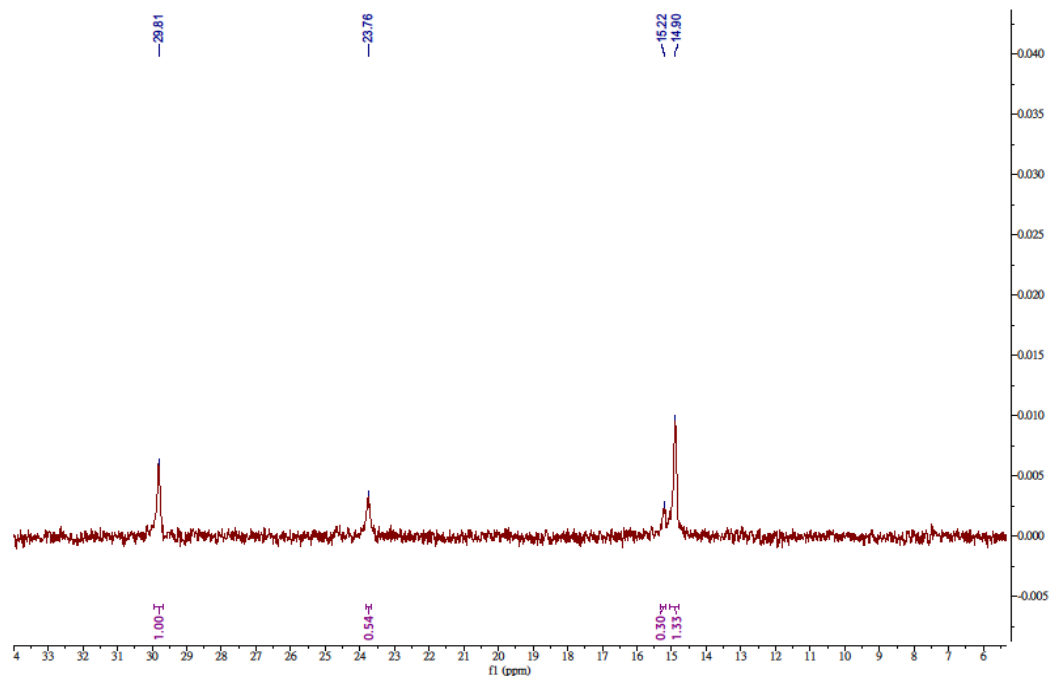

**Figure S20.** The in-situ  $^{31}\text{P}\{^1\text{H}\}$  NMR spectrum of complex **1a** in  $\text{CDCl}_3$  after stored under air at room temperature for 14 days. Peak assignments: 29.81,  $\text{Ph}_3\text{P}=\text{O}$ ; 23.76, unreacted **1a**, 15.22,  $[\text{Ph}_3\text{PCH}=\text{CPh}-\text{CPh}=\text{CHPPh}_3]^{2+}$  (**4a**); 14.90,  $\text{cis-}[\text{PhCH}=\text{CHPPh}_3]^+$  (**3a**).

tly-MA Tsang 006, MW=1014  
jia230104\_1 29 (0.288) Cm (29-1:8)

1: TOF MS ES+  
1.20e7

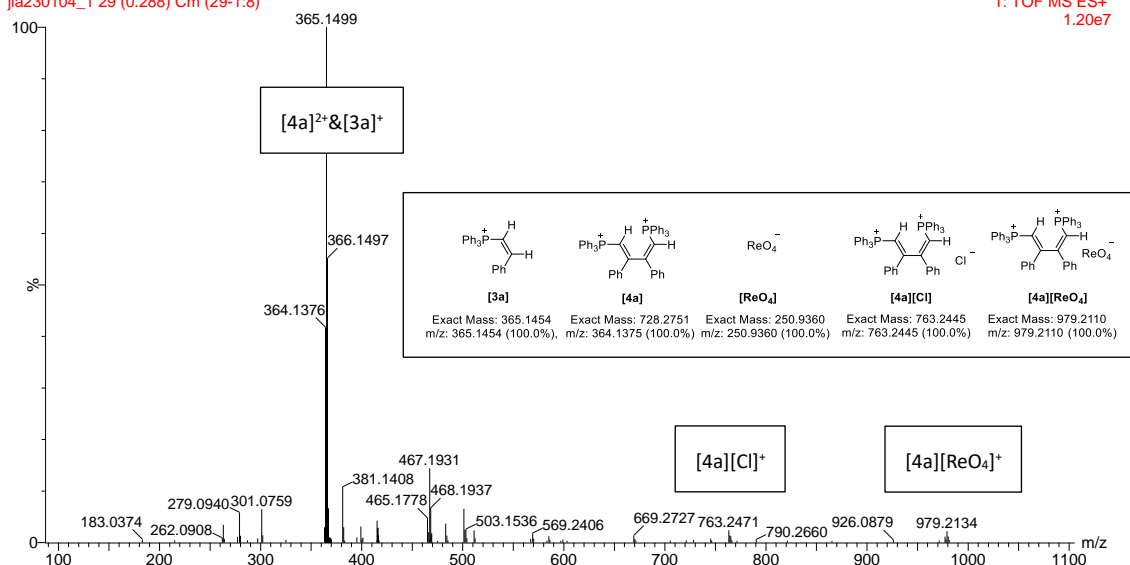

tly-MA Tsang 006, MW=1014  
jia230104\_2 20 (0.200) Cm (20-1:7)

1: TOF MS ES-  
8.27e6

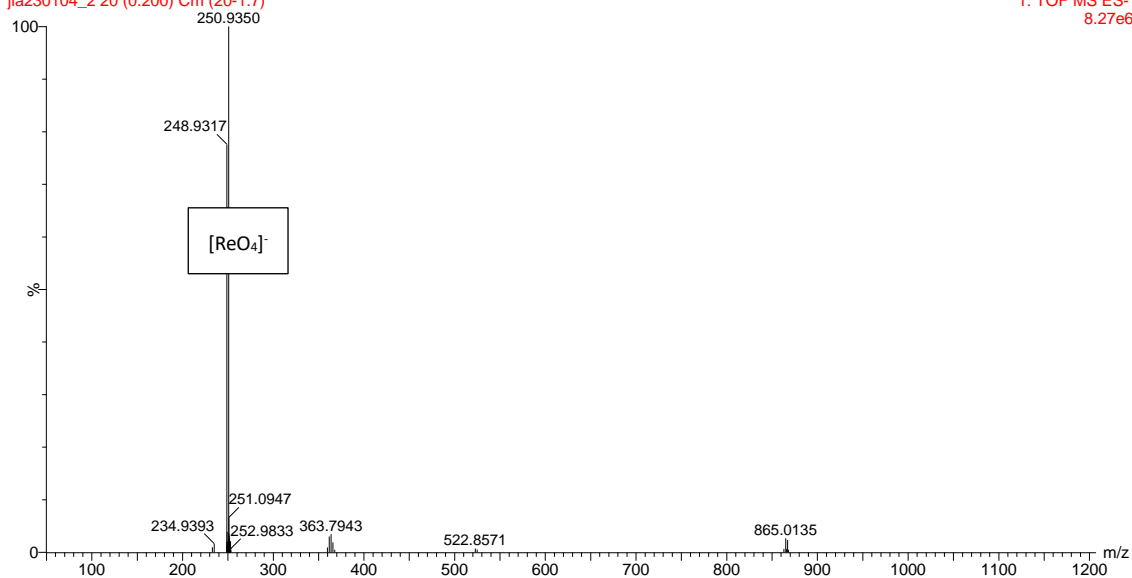

**Figure S21.** The mass spectra of a  $CDCl_3$  solution of the complex **1a** stored under air at room temperature for 14 days in positive (top) and negative (below) modes. Calculated  $m/z$ :  $ReO_4^-$ , 250.9345;  $1/2[(Ph_3P)CH=C(Ph)-C(Ph)=CH(PPh_3)]^{2+}$  ( $1/2[C_{52}H_{42}P_2]^{2+}$ , **4a/2**), 364.1375;  $[Ph_3PCH=CHPh]^+$  ( $C_{26}H_{22}P^+$ , **3a**), 365.1454;  $[4a-Cl]^+$ , 763.2445;  $[4a-ReO_4]^+$ , 979.2110.

## 7. References

1. G. Rouschias and G. Wilkinson, *J. Chem. Soc. A*, 1967, 993-1000.
2. W. Bai, L. Y. Tsang, Y. Wang, Y. Li, H. H. Sung, I. D. Williams and G. Jia, *Chem. Sci.*, 2023, **14**, 96–102.
3. O. V. Dolomanov, L. J. Bourhis, R. J. Gildea, J. A. K. Howard and H. J. Puschmann, *Appl. Cryst.*, 2009, **42**, 339-341.
4. G. M. Sheldrick, *Acta Cryst.*, 2015, **A71**, 3-8.
5. G. M. Sheldrick, *Acta Cryst.*, 2015, **C71**, 3-8.
6. Experimental work: (a) P. J. Hansen and J. H. Espenson, *Inorg. Chem.*, 1995, **34**, 5839–5844.; (b) K. A. Brittingham and J. H. Espenson, *Inorg. Chem.*, 1999, **38**, 744-750.; (c) M. M. Abu-Omar, P. J. Hansen and J. H. Espenson, *J. Am. Chem. Soc.*, 1996, **118**, 4966–4974.; (d) J. H. Espenson, O. Pestovsky, P. Huston and S. Staudt, *J. Am. Chem. Soc.*, 1994, **116**, 2869–2877.; (e) S. Yamazaki, J. H. Espenson and P. Huston, *Inorg. Chem.*, 1993, **32**, 4683–4687. (f) W.-D. Wang and J. H. Espenson, *Inorg. Chem.*, 1997, **36**, 5069–5075; Theoretical work: (a) M. L. Kuznetsov and A. J. Pombeiro, *Inorg. Chem.*, 2009, **48**, 307–318.; (b) T. Hwang, B. R. Goldsmith, B. Peters and S. L. Scott, *Inorg. Chem.*, 2013, **52**, 13904–13917.; (c) P. Gisdakis, S. Antonczak, S. Köstlmeier, W. A. Herrmann and N. Rösch, *Angew. Chem. Int. Ed.*, 1998, **37**, 2211–2214.; (d) J. M. Gonzales, R. Distasio, R. A. Periana, W. A. Goddard and J. Oxgaard, *J. Am. Chem. Soc.*, 2007, **129**, 15794–15804; (e) P. Gisdakis, I. V. Yudanov and N. Rösch, *Inorg. Chem.*, 2001, **40**, 3755–3765.
7. M. J. Frisch, G. W. Trucks, H. B. Schlegel, G. E. Scuseria, M. A. Robb, J. R. Cheeseman, G. Scalmani, V. Barone, B. Mennucci, G. A. Petersson, H. Nakatsuji, M. Caricato, X. Li, H. P. Hratchian, A. F. Izmaylov, J. Bloino, G. Zheng, J. L. Sonnenberg, M. Hada, M. Ehara, K. Toyota, R. Fukuda, J. Hasegawa, M. Ishida, T. Nakajima, Y. Honda, O. Kitao, H. Nakai, T. Vreven, J. A. Montgomery, Jr., J. E. Peralta, F. Ogliaro, M. Bearpark, J. J. Heyd, E. Brothers, K. N. Kudin, V. N. Staroverov, T. Keith, R. Kobayashi, J. Normand, K. Raghavachari, A. Rendell, J. C. Burant, S. S. Iyengar, J. Tomasi, M. Cossi, N. Rega, J. M. Millam, M. Klene, J. E. Knox, J. B. Cross, V. Bakken, C. Adamo, J. Jaramillo, R. Gomperts, R. E. Stratmann, O. Yazyev, A. J. Austin, R. Cammi, C. Pomelli, J. W. Ochterski, R. L. Martin, K. Morokuma, V. G. Zakrzewski, G. A. Voth, P. Salvador, J. J. Dannenberg, S. Dapprich, A. D. Daniels, O. Farkas, J. B. Foresman, J. V. Ortiz, J. Cioslowski and D. J. Fox, Gaussian 09, Revision D.01, Gaussian, Inc., Wallingford CT, **2013**.
8. a) A. D. Becke, *J. Chem. Phys.*, 1993, **98**, 5648–5652.; b) C. Lee, W. Yang and R. G. Parr, *Phys. Rev. B*, 1988, **37**, 785–789.; c) P. J. Stephens, F. J. Devlin, C. F. Chabalowski and M. J. Frisch, *J. Phys. Chem.*, 1994, **98**, 11623–11627.; d) S. Grimme, S. Ehrlich and L. Goerigk, *J. Comput. Chem.*, 2011, **32**, 1456–1465.
9. F. Weigend and R. Ahlrichs, *Phys. Chem. Chem. Phys.*, 2005, **7**, 3297–3305.
10. D. Andrae, U. Häußermann, M. Dolg, H. Stoll and H. Preuß, *Theor. Chim. Acta*, 1990, **77**, 123–141.
11. J. Tomasi, B. Mennucci and R. Cammi, *Chem. Rev.*, 2005, **105**, 2999–3094.
12. a) K. Fukui, *Acc. Chem. Res.*, 1981, **14**, 363–368.; b) M. Page and J. W. McIver, *J.*

- Chem. Phys.*, 1988, **88**, 922–935.; c) M. Page, C. Doubleday and J. W. McIver, *J. Chem. Phys.*, 1990, **93**, 5634–5642.
13. C. Y. Legault, CYLview20, Université de Sherbrooke, **2020**  
(<http://www.cylview.org>).
